# Supplementary material for: N -Glycosylation in isolated rat nerve terminals
Source: Royal Society of Chemistry journal article supplement (doi:10.1039/d0mo00044b), 2021-06-04
Supplement: d0mo00044b2.xlsx [file d0mo00044b2.xlsx]

## Sheet: Sheet1
	Synaptosome preparation 1				Synaptosome preparation 2				Synaptosome preparation 3	Synaptosome preparation 4
Stimulation	4x Control		4x KCl		6x Samples				4x Samples	2x Samples
Fraction	SDS-insoluble	SDS-soluble	SDS-insoluble	SDS-soluble	SDS-insoluble		SDS-soluble		All SDS-soluble fractions pooled
Analyzed species	N-glycans				TiO2-enriched glycopeptides				TiO2-enriched glycopeptides
Figures and Tables	Figure 2 and 3, Table 1				Figure 4 and Supplementary Figures				Figure 4 and 5, Supplementary Figures
