# Supplementary material for: N -Glycosylation in isolated rat nerve terminals
Source: Royal Society of Chemistry journal article supplement (doi:10.1039/d0mo00044b), 2021-06-04
Supplement: d0mo00044b3.xlsx [file d0mo00044b3.xlsx]

## Sheet: For supplementary
N-glycan class	ID #	Detected m/z	RT	Glycan name (Oxford nomenclature)	Charge state	N-glycan composition				Theoretical m/z	∆ m/z	Relative abundances of N-glycans [%]
												SDS-insoluble fraction								SDS-soluble fraction
						Hex	HexNAc	dHex	Neu5Ac			Con1	Con2	Con3	Con4	KCl1	KCl2	KCl3	KCl4	Con1	Con2	Con3	Con4	KCl1	KCl2	KCl3	KCl4
Paucimannose	1	749.38	20.9	M2	1	2	2			749.283	0.0966	0.4	0.66	0.83	0.88	0.42	0.47	0.3	0.58	1.04	0.73	2.08	1.27	1	0.43	1.06	2.01
Paucimannose	2	895.42	28.3	FM2	1	2	2	1		895.341	0.0787	0.83	1.02	1.24	1.12	0.64	1.01	0.62	0.92	1.75	1.34	2.59	1.91	2.11	1	1.94	2.5
Paucimannose	3	1057.42	34.6	FM3	1	3	2	1		1057.39	0.0259	2.38	2.78	3.13	2.46	2.22	2.72	1.87	1.52	2.23	2.05	3.32	1.69	2.46	1.72	2.55	2.14
Paucimannose	4	1073.38	23.3	M4	1	4	2			1073.39	-0.009	0.44	0.33	nd	nd	0.5	0.45	0.39	0.39	0.55	0.65	0.64	0.59	0.56	0.67	0.52	0.7
Paucimannose	5	1073.38	24.7	M4	1	4	2			1073.39	-0.009	0.49	0.51	0.65	0.52	0.52	0.58	0.43	0.32	0.37	0.45	0.63	0.48	0.45	0.45	0.43	0.57
Paucimannose	6	1219.47	32	FM4	1	4	2	1		1219.45	0.0231	0.23	0.22	0.24	0.23	0.21	0.26	0.21	0.14	0.18	0.23	0.24	0.22	0.21	0.19	0.22	0.21
Oligomannose	7	1235.5	29	M5	1	5	2			1235.44	0.0582	11.88	11.7	13.34	12.28	11.96	12.44	11.73	10.25	11.88	11.4	14.62	11.06	12.17	10.51	13.84	10.54
Oligomannose	8	698.33	23.4	M6	2	6	2			698.247	0.0827	10.65	9.28	8.31	9.76	8.86	10.77	7.85	10.42	7.69	7.02	9.92	10.48	8.42	8.08	7.03	9.09
Oligomannose	9	779.39	23	M7	2	7	2			779.274	0.1163	11.98	16.47	16.77	14.9	16.73	16.09	18.65	21.34	14.15	15.3	13.83	17.41	13.35	18.02	15.16	16.33
Oligomannose	10	860.37	23.2	M8	2	8	2			860.3	0.0699	8.56	8.92	8.71	14.51	8.29	9.08	12.81	14.02	7.76	11.09	7.4	10.96	7.61	12.45	9.19	12.31
Oligomannose	11	941.39	23.4	M9	2	9	2			941.326	0.0635	7.97	7.31	7.61	7.42	7.04	7.67	6.83	9.15	5.39	6.07	5.56	6.45	5.47	7.41	5.07	5.28
Hybrid	12	718.84	20.3	M5B	2	5	3			718.761	0.0794	0.62	nd	nd	nd	0.43	nd	0.26	0.68	0.32	0.33	0.3	0.72	0.37	0.36	0.45	0.88
Hybrid	13	791.85	20.8	FM5B	2	5	3	1		791.79	0.06045	0.37	1.73	1.07	0.81	0.68	0.75	0.21	0.55	0.27	0.37	0.44	0.51	0.43	0.29	0.79	0.8
Hybrid	14	820.34	18.7	M5BA1	2	5	4			820.3	0.0397	1.41	0.74	1.06	2.23	1.29	1.24	1.5	2.02	1.51	1.46	1.32	2.56	1.5	1.26	1.39	3.37
Hybrid	15	974.38	18.8	M5BA1G1F(3)1	2	6	4	1		974.356	0.02435	0.86	0.77	0.62	1.26	0.64	0.68	0.85	0.49	1.59	1.33	0.99	1.84	1.32	1.17	1.43	1.34
Hybrid	16	812.36	20.7	FM4BA1	2	4	4	1		812.303	0.05715	1.14	0.83	1.01	0.74	0.93	0.78	0.8	0.37	1.14	1.01	1.03	0.78	1.23	0.96	1.07	1.78
Hybrid	17	893.35	24.7	FM4BA1G1	2	5	4	1		893.329	0.02075	1.2	0.95	0.95	0.78	1.07	1.12	1.18	0.74	1.5	1.43	1.09	0.87	1.59	1.15	1.53	1.47
Hybrid	18	966.35	20.5	FM4BA1G1F(3)1	2	5	4	2		966.358	-0.0082	1.84	1.75	2.19	0.84	2.07	1.76	1.81	1.45	2.79	2.91	2.48	1.74	2.86	2.22	2.86	2.86
Hybrid	19	791.85	25.6	FM5A1	2	5	3	1		791.79	0.06045	0.81	0.77	0.68	nd	0.31	0.36	0.69	nd	0.69	0.83	0.7	nd	0.8	0.6	0.28	nd
Hybrid	20	872.84	24.2	M5A1G1F(3)1	2	6	3	1		872.816	0.02405	1.24	1.01	0.92	1.13	1.09	1.05	0.97	0.91	1.19	0.97	0.92	0.68	0.93	0.88	0.99	1.17
Hybrid	21	945.34	34.5	M5A1G1S1	2	6	3		1	945.335	0.0053	0.54	0.7	0.5	0.42	0.6	0.6	0.7	0.41	0.76	0.95	0.5	0.56	0.79	1.01	0.68	0.59
Hybrid	22	1018.33	38.9	FM5A1G1S1	2	6	3	1	1	1018.36	-0.03365	0.44	0.49	0.6	0.27	0.4	0.56	0.49	0.35	0.42	0.57	0.36	0.35	0.45	0.42	0.46	0.32
Hybrid	23	864.83	26.3	FM4A1G1F(3)1	2	5	3	2		864.818	0.0115	0.68	0.72	0.68	0.8	0.84	0.7	0.65	0.51	0.77	0.74	0.59	0.41	0.7	0.7	0.83	0.52
Hybrid	24	937.35	36.8	FM4A1G1S1	2	5	3	1	1	937.337	0.01275	1.3	1.4	1.74	1.01	1.26	1.35	1.4	0.91	1.17	1.15	0.97	0.86	1.08	0.84	1.17	0.86
Hybrid	25	1082.85	34.1	FM4A1G1S2	2	5	3	1	2	1082.88	-0.03495	0.59	0.66	0.64	0.47	0.76	0.6	0.74	0.59	1.23	1.32	0.93	0.67	1.24	1.13	1.01	0.75
Complex	26	759.88	18.2	A2B	2	3	5			759.787	0.0928	1.75	1.68	1.35	1.99	1.73	1.52	0.86	1.32	1.23	1.57	1.38	1.46	2	1.03	1.52	1.63
Complex	27	832.94	21.7	FA2B	2	3	5	1		832.816	0.12385	8.39	7.74	8.12	8.18	8.43	6.72	6.53	5.55	8.35	7.58	6.99	7.96	8.25	7.29	7.19	5.01
Complex	28	913.85	18.4	FA2BG1	2	4	5	1		913.843	0.00745	0.42	0.92	nd	1.03	0.26	0.39	0.4	0.23	0.65	0.56	0.4	0.4	0.46	0.37	0.37	nd
Complex	29	986.92	22.1	FA2BG1F(3)1	2	4	5	2		986.871	0.0485	2.69	2.63	2.53	2.2	2.87	2.68	2.39	2.48	3.07	2.73	2.53	1.87	2.76	2.11	2.34	2.43
Complex	30	1059.34	28	FA2BG1S1	2	4	5	1	1	1059.39	-0.05025	0.47	0.36	0.45	0.32	0.47	0.43	0.44	0.37	0.5	0.44	0.48	0.04	0.52	0.5	0.42	0.37
Complex	31	1204.8	28.2	FA2BG1S2	2	4	5	1	2	1204.94	-0.13795	0.2	0.16	0.14	0.19	0.14	0.19	0.17	0.21	0.14	0.23	0.13	0.22	0.15	0.19	0.17	0.19
Complex	32	731.37	27.5	FA2	2	3	4	1		731.276	0.09355	9.53	7.8	7.13	6.51	8.47	7.67	7.64	5.74	8.72	6.39	7.89	7.79	8.18	6.62	8.15	6.77
Complex	33	812.35	31.1	FA2G1	2	4	4	1		812.303	0.04715	1.08	0.29	0.86	0.25	0.39	0.4	0.35	0.32	0.46	0.23	0.36	0.23	0.26	0.2	0.28	0.2
Complex	34	885.38	28.7	FA2G1F(3)1	2	4	4	2		885.332	0.0482	3.04	3.17	2.83	2.21	3.36	3.4	3.11	2.02	3.99	3.66	2.7	2.44	3.9	2.84	3.34	2.47
Complex	35	957.86	31.9	FA2G1S1	2	4	4	1	1	957.851	0.00945	0.45	0.63	0.31	0.36	0.71	0.64	0.57	0.32	0.4	0.28	0.27	0.27	0.4	0.33	0.36	0.24
Complex	36	957.86	39.2	FA2G1S1	2	4	4	1	1	957.851	0.00945	0.54	0.23	nd	nd	0.35	0.31	0.28	0.18	0.44	0.35	nd	0.16	0.31	0.31	0.35	0.22
Complex	37	1103.33	36.2	FA2G1S2	2	4	4	1	2	1103.4	-0.06825	0.76	0.94	1.01	0.74	0.92	0.81	0.99	0.56	1.22	1.03	0.94	0.66	1.02	0.92	0.91	0.66
Complex	38	1184.37	46.7	FA2G2S2	2	5	4	1	2	1184.42	-0.05465	0.48	0.58	0.54	0.32	0.5	0.53	0.63	0.36	0.47	0.65	0.49	0.3	0.59	0.67	0.51	0.28
Complex	39	1257.42	36.6	FA2G2F(3)1S2	2	5	4	2	2	1257.45	-0.0336	0.66	0.75	0.72	0.46	0.76	0.78	0.92	0.48	1.11	1.42	0.97	0.46	1.07	1.38	1.06	0.51
Complex	40	1111.29	29.3	A2G2S2	2	5	4		2	1111.4	-0.1057	0.18	nd	nd	nd	0.12	nd	0.06	0.25	0.29	0.19	0.25	0.24	0.23	0.32	0.25	0.12
Complex	41	1160.94	31.6	FA4G1S1	2	4	6	1	1	1160.93	0.01005	0.51	0.41	0.55	0.32	0.53	0.44	0.51	0.39	0.66	0.72	0.51	0.36	0.62	0.7	0.61	0.38
