# Supplementary material for: N -Glycosylation in isolated rat nerve terminals
Source: Royal Society of Chemistry journal article supplement (doi:10.1039/d0mo00044b), 2021-06-04
Supplement: d0mo00044b4.xlsx [file d0mo00044b4.xlsx]

## Sheet: N-glycopeptides
Sequence	VariableFinalModNameList	CompositionList	PSMs	PEP	PEP1	AbsLogProb	Score	Delta	DeltaMod	Charge	ObservedMz	CalcMz	MassErrPPM	ObservedMH	CalcMH	Uniprot accession	Protein name	Position	ScanTimeList	Scan Number	Fixed Modification	PosteriorErrorProbability2_sum	PosteriorErrorProbability1_sum
K.VAEIPFN[+1751.62420]STNKYQLSIHETEDPNDNR.Y	N7(NGlycan / 1751.6242)	HexNAc(4)Hex(4)NeuAc(1)	4	3.36636e-08	2.84149e-07	7.47284	568.798	484.216	53.0057	3	1595.36	1595.03	-1.92135	4784.06	4783.06	P06687	AT1A3_RAT Sodium/potassium-transporting ATPase subunit alpha-3 OS=Rattus norvegicus OX=10116 GN=Atp1a3 PE=1 SV=2	467	51.1992	15128		6.04675e-10	5.20625e-09
R.HEN[+1540.52851]NTNLPIQHEFSLTR.E	N3(NGlycan / 1540.5285)	HexNAc(2)Hex(7)	6	1.26327e-14	1.0663e-13	13.8985	791.001	514.509	514.509	4	898.39	898.39	-0.659558	3590.54	3590.54	P01830	THY1_RAT Thy-1 membrane glycoprotein OS=Rattus norvegicus OX=10116 GN=Thy1 PE=1 SV=1	40	60.679	19037		7.23226e-16	5.48514e-15
R.HEN[+1378.47569]NTNLPIQHEFSLTR.E	N3(NGlycan / 1378.4757)	HexNAc(2)Hex(6)	8	3.65715e-19	3.08694e-18	18.4369	1000.49	893.325	893.325	3	1143.5	1143.5	-0.27636	3428.48	3428.49	P01830	THY1_RAT Thy-1 membrane glycoprotein OS=Rattus norvegicus OX=10116 GN=Thy1 PE=1 SV=1	40	60.1106	18793		3.26507e-20	2.78438e-19
R.HEN[+1216.42286]NTNLPIQHEFSLTR.E	N3(NGlycan / 1216.4229)	HexNAc(2)Hex(5)	12	1.26327e-19	1.0663e-18	18.8985	1003.59	733.978	733.978	4	817.363	817.364	-0.621878	3266.43	3266.43	P01830	THY1_RAT Thy-1 membrane glycoprotein OS=Rattus norvegicus OX=10116 GN=Thy1 PE=1 SV=1	40	60.6238	19013		1.36826e-20	1.08999e-19
R.HEN[+1054.37004]NTNLPIQHEFSLTR.E	N3(NGlycan / 1054.37)	HexNAc(2)Hex(4)	14	1.21001e-24	1.02135e-23	23.9172	1269.72	1019.13	1019.13	4	776.85	776.85	-0.311056	3104.38	3104.38	P01830	THY1_RAT Thy-1 membrane glycoprotein OS=Rattus norvegicus OX=10116 GN=Thy1 PE=1 SV=1	40	60.4879	18954		8.87825e-26	7.27111e-25
R.HEN[+730.26439]NTNLPIQHEFSLTR.E	N3(NGlycan / 730.2644)	HexNAc(2)Hex(2)	9	1.26327e-20	1.0663e-19	19.8985	1090.09	887.32	887.32	4	695.823	695.824	-1.16132	2780.27	2780.27	P01830	THY1_RAT Thy-1 membrane glycoprotein OS=Rattus norvegicus OX=10116 GN=Thy1 PE=1 SV=1	40	60.7286	19058		1.26751e-21	1.07901e-20
K.VLTLAN[+2303.84086]FTTKDEGDYMC[+57.02146]ELR.V	N6(NGlycan / 2303.8409)	HexNAc(6)Hex(4)Fuc(1)NeuAc(1)	3	4.2547e-13	3.59131e-12	12.3711	721.538	499.088	499.088	3	1560.66	1560.66	-2.06192	4679.95	4679.96	P01830	THY1_RAT Thy-1 membrane glycoprotein OS=Rattus norvegicus OX=10116 GN=Thy1 PE=1 SV=1	88	99.3375	39042	C17(Carbamidomethyl / 57.0215)	2.24016e-14	1.85844e-13
K.VLTLAN[+2262.81431]FTTKDEGDYM[+15.99492]C[+57.02146]ELR.V	N6(NGlycan / 2262.8143); M16(Oxidation / 15.9949)	HexNAc(5)Hex(5)Fuc(1)NeuAc(1)	2	3.34975e-07	2.82746e-06	6.47499	457.151	406.556	375.939	4	1164.74	1164.49	3.22562	4655.95	4654.93	P01830	THY1_RAT Thy-1 membrane glycoprotein OS=Rattus norvegicus OX=10116 GN=Thy1 PE=1 SV=1	88	82.3784	29814	C17(Carbamidomethyl / 57.0215)	7.15895e-09	6.10028e-08
K.VLTLAN[+2262.81431]FTTKDEGDYMC[+57.02146]ELR.V	N6(NGlycan / 2262.8143)	HexNAc(5)Hex(5)Fuc(1)NeuAc(1)	4	6.87907e-13	5.8065e-12	12.1625	747.259	561.289	561.289	3	1547.32	1546.98	2.3408	4639.95	4638.94	P01830	THY1_RAT Thy-1 membrane glycoprotein OS=Rattus norvegicus OX=10116 GN=Thy1 PE=1 SV=1	88	92.5528	35238	C17(Carbamidomethyl / 57.0215)	2.73797e-14	2.29319e-13
K.VLTLAN[+2100.76148]FTTKDEGDYM[+15.99492]C[+57.02146]ELR.V	N6(NGlycan / 2100.7615); M16(Oxidation / 15.9949)	HexNAc(5)Hex(4)Fuc(1)NeuAc(1)	3	7.01822e-09	5.92396e-08	8.15377	542.278	411.572	411.572	3	1498.3	1498.3	-0.982832	4492.87	4492.88	P01830	THY1_RAT Thy-1 membrane glycoprotein OS=Rattus norvegicus OX=10116 GN=Thy1 PE=1 SV=1	88	89.259	33481	C17(Carbamidomethyl / 57.0215)	1.43006e-10	1.30892e-09
K.VLTLAN[+2100.76148]FTTKDEGDYMC[+57.02146]ELR.V	N6(NGlycan / 2100.7615)	HexNAc(5)Hex(4)Fuc(1)NeuAc(1)	3	2.8474e-07	2.40343e-06	6.54555	528.906	337.605	337.605	3	1492.97	1492.97	-0.431636	4476.88	4476.88	P01830	THY1_RAT Thy-1 membrane glycoprotein OS=Rattus norvegicus OX=10116 GN=Thy1 PE=1 SV=1	88	99.9174	39437	C17(Carbamidomethyl / 57.0215)	5.74147e-09	4.91553e-08
K.VLTLAN[+1955.72397]FTTKDEGDYM[+15.99492]C[+57.02146]ELR.V	N6(NGlycan / 1955.724); M16(Oxidation / 15.9949)	HexNAc(5)Hex(4)Fuc(2)	4	2.22807e-14	1.88067e-13	13.6521	779.138	684.524	684.524	3	1449.95	1449.95	-0.755532	4347.84	4347.84	P01830	THY1_RAT Thy-1 membrane glycoprotein OS=Rattus norvegicus OX=10116 GN=Thy1 PE=1 SV=1	88	82.8235	30045	C17(Carbamidomethyl / 57.0215)	1.55269e-15	1.25551e-14
K.VLTLAN[+1955.72397]FTTKDEGDYMC[+57.02146]ELR.V	N6(NGlycan / 1955.724)	HexNAc(5)Hex(4)Fuc(2)	6	2.13413e-12	1.80138e-11	11.6708	698.351	521.025	521.025	3	1444.62	1444.62	0.153115	4331.85	4331.84	P01830	THY1_RAT Thy-1 membrane glycoprotein OS=Rattus norvegicus OX=10116 GN=Thy1 PE=1 SV=1	88	92.923	35444	C17(Carbamidomethyl / 57.0215)	1.04769e-13	8.55114e-13
K.VLTLAN[+1914.69743]FTTKDEGDYM[+15.99492]C[+57.02146]ELR.V	N6(NGlycan / 1914.6974); M16(Oxidation / 15.9949)	HexNAc(4)Hex(5)Fuc(2)	3	3.37165e-10	2.84595e-09	9.47216	585.964	481.491	28.8698	4	1077.21	1077.46	-0.355558	4305.81	4306.81	P01830	THY1_RAT Thy-1 membrane glycoprotein OS=Rattus norvegicus OX=10116 GN=Thy1 PE=1 SV=1	88	83.594	30460	C17(Carbamidomethyl / 57.0215)	7.45555e-12	5.71845e-11
K.VLTLAN[+1914.69743]FTTKDEGDYMC[+57.02146]ELR.V	N6(NGlycan / 1914.6974)	HexNAc(4)Hex(5)Fuc(2)	3	1.72385e-16	1.45507e-15	15.7635	854.652	694.18	41.0018	4	1073.46	1073.46	-0.503126	4290.82	4290.82	P01830	THY1_RAT Thy-1 membrane glycoprotein OS=Rattus norvegicus OX=10116 GN=Thy1 PE=1 SV=1	88	93.5805	35793	C17(Carbamidomethyl / 57.0215)	1.74298e-17	1.40154e-16
K.VLTLAN[+1809.66607]FTTKDEGDYMC[+57.02146]ELR.V	N6(NGlycan / 1809.6661)	HexNAc(5)Hex(4)Fuc(1)	1	4.33709e-06	3.66076e-05	5.3628	401.083	238.936	238.936	4	1047.2	1047.2	0.210386	4185.79	4185.79	P01830	THY1_RAT Thy-1 membrane glycoprotein OS=Rattus norvegicus OX=10116 GN=Thy1 PE=1 SV=1	88	93.2478	35625	C17(Carbamidomethyl / 57.0215)	1.39304e-07	1.07403e-06
K.VLTLAN[+1768.63952]FTTKDEGDYM[+15.99492]C[+57.02146]ELR.V	N6(NGlycan / 1768.6395); M16(Oxidation / 15.9949)	HexNAc(4)Hex(5)Fuc(1)	3	8.95183e-08	7.55607e-07	7.04809	515.206	393.323	393.323	4	1040.69	1040.94	-0.180582	4159.75	4160.76	P01830	THY1_RAT Thy-1 membrane glycoprotein OS=Rattus norvegicus OX=10116 GN=Thy1 PE=1 SV=1	88	83.9077	30623	C17(Carbamidomethyl / 57.0215)	1.85264e-09	1.46159e-08
K.VLTLAN[+1752.64460]FTTKDEGDYM[+15.99492]C[+57.02146]ELR.V	N6(NGlycan / 1752.6446); M16(Oxidation / 15.9949)	HexNAc(4)Hex(4)Fuc(2)	4	2.13413e-12	1.80138e-11	11.6708	651.264	509.628	12.0286	3	1382.26	1382.26	-0.344284	4144.76	4144.76	P01830	THY1_RAT Thy-1 membrane glycoprotein OS=Rattus norvegicus OX=10116 GN=Thy1 PE=1 SV=1	88	83.3331	30319	C17(Carbamidomethyl / 57.0215)	1.03828e-13	8.45899e-13
K.VLTLAN[+1768.63952]FTTKDEGDYMC[+57.02146]ELR.V	N6(NGlycan / 1768.6395)	HexNAc(4)Hex(5)Fuc(1)	4	2.22807e-16	1.88067e-15	15.6521	851.996	682.198	543.563	3	1382.26	1382.26	-0.962681	4144.76	4144.76	P01830	THY1_RAT Thy-1 membrane glycoprotein OS=Rattus norvegicus OX=10116 GN=Thy1 PE=1 SV=1	88	93.6468	35823	C17(Carbamidomethyl / 57.0215)	2.1042e-17	1.74923e-16
K.VLTLAN[+1752.64460]FTTKDEGDYMC[+57.02146]ELR.V	N6(NGlycan / 1752.6446)	HexNAc(4)Hex(4)Fuc(2)	6	3.9724e-14	3.35303e-13	13.4009	769.103	593.989	26.679	3	1376.93	1376.93	0.965439	4128.77	4128.77	P01830	THY1_RAT Thy-1 membrane glycoprotein OS=Rattus norvegicus OX=10116 GN=Thy1 PE=1 SV=1	88	93.3711	35687	C17(Carbamidomethyl / 57.0215)	2.36396e-15	1.92474e-14
K.VLTLAN[+1751.62420]FTTKDEGDYMC[+57.02146]ELR.V	N6(NGlycan / 1751.6242)	HexNAc(4)Hex(4)NeuAc(1)	1	6.86084e-14	5.79111e-13	13.1636	753.637	602.621	2.03365	3	1376.93	1376.59	3.67581	4128.76	4127.75	P01830	THY1_RAT Thy-1 membrane glycoprotein OS=Rattus norvegicus OX=10116 GN=Thy1 PE=1 SV=1	88	93.3524	35678	C17(Carbamidomethyl / 57.0215)	3.01435e-15	2.45217e-14
K.VLTLAN[+1711.61805]FTTKDEGDYMC[+57.02146]ELR.V	N6(NGlycan / 1711.6181)	HexNAc(3)Hex(5)Fuc(2)	3	4.17412e-13	3.5233e-12	12.3794	743.002	534.771	534.771	3	1362.92	1363.25	-0.0409619	4086.74	4087.74	P01830	THY1_RAT Thy-1 membrane glycoprotein OS=Rattus norvegicus OX=10116 GN=Thy1 PE=1 SV=1	88	93.4929	35746	C17(Carbamidomethyl / 57.0215)	2.22014e-14	1.83894e-13
K.VLTLAN[+1647.61324]FTTKDEGDYM[+15.99492]C[+57.02146]ELR.V	N6(NGlycan / 1647.6132); M16(Oxidation / 15.9949)	HexNAc(5)Hex(3)Fuc(1)	6	2.22807e-14	1.88067e-13	13.6521	799.493	699.705	699.705	3	1347.25	1347.25	-1.56498	4039.72	4039.73	P01830	THY1_RAT Thy-1 membrane glycoprotein OS=Rattus norvegicus OX=10116 GN=Thy1 PE=1 SV=1	88	83.7765	30552	C17(Carbamidomethyl / 57.0215)	1.56458e-15	1.26707e-14
K.VLTLAN[+1647.61324]FTTKDEGDYMC[+57.02146]ELR.V	N6(NGlycan / 1647.6132)	HexNAc(5)Hex(3)Fuc(1)	4	2.13413e-17	1.80138e-16	16.6708	929.065	737.925	737.925	3	1341.92	1341.92	-0.134909	4023.73	4023.73	P01830	THY1_RAT Thy-1 membrane glycoprotein OS=Rattus norvegicus OX=10116 GN=Thy1 PE=1 SV=1	88	93.4701	35735	C17(Carbamidomethyl / 57.0215)	2.51867e-18	2.11075e-17
K.VLTLAN[+1444.53387]FTTKDEGDYM[+15.99492]C[+57.02146]ELR.V	N6(NGlycan / 1444.5339); M16(Oxidation / 15.9949)	HexNAc(4)Hex(3)Fuc(1)	3	3.92657e-09	3.31434e-08	8.40599	563.721	416.387	416.387	3	1279.55	1279.55	-0.97265	3836.65	3836.65	P01830	THY1_RAT Thy-1 membrane glycoprotein OS=Rattus norvegicus OX=10116 GN=Thy1 PE=1 SV=1	88	84.2283	30790	C17(Carbamidomethyl / 57.0215)	5.28031e-11	4.40444e-10
K.VLTLAN[+1444.53387]FTTKDEGDYMC[+57.02146]ELR.V	N6(NGlycan / 1444.5339)	HexNAc(4)Hex(3)Fuc(1)	4	2.13413e-17	1.80138e-16	16.6708	904.189	711.19	711.19	3	1274.22	1274.22	-0.422589	3820.65	3820.65	P01830	THY1_RAT Thy-1 membrane glycoprotein OS=Rattus norvegicus OX=10116 GN=Thy1 PE=1 SV=1	88	93.9764	35989	C17(Carbamidomethyl / 57.0215)	2.53672e-18	2.12785e-17
K.VLTLAN[+1647.61324]FTTK.D	N6(NGlycan / 1647.6132)	HexNAc(5)Hex(3)Fuc(1)	3	3.30978e-11	2.79372e-10	10.4802	621.338	422.175	422.175	2	1378.13	1378.13	-0.540481	2755.25	2755.25	P01830	THY1_RAT Thy-1 membrane glycoprotein OS=Rattus norvegicus OX=10116 GN=Thy1 PE=1 SV=1	88	76.4939	26778		1.22824e-12	9.68524e-12
K.KVLVAPPSEEAN[+3372.19016]TTK.A	N12(NGlycan / 3372.1902)	HexNAc(6)Hex(7)Fuc(1)NeuAc(3)	2	4.15952e-07	3.51097e-06	6.38096	562.302	263.628	263.628	4	1240.02	1239.77	4.01707	4957.08	4956.05	P31596	EAA2_RAT Excitatory amino acid transporter 2 OS=Rattus norvegicus OX=10116 GN=Slc1a2 PE=1 SV=2	194	40.1132	10943		9.07113e-09	7.74533e-08
K.VLVAPPSEEAN[+3663.28558]TTK.A	N11(NGlycan / 3663.2856)	HexNAc(6)Hex(7)Fuc(1)NeuAc(4)	4	2.81346e-07	2.37478e-06	6.55076	543.87	331.658	331.658	4	1280.77	1280.52	3.70457	5120.08	5119.05	P31596	EAA2_RAT Excitatory amino acid transporter 2 OS=Rattus norvegicus OX=10116 GN=Slc1a2 PE=1 SV=2	195	49.1709	14362		5.54398e-09	4.72037e-08
K.VLVAPPSEEAN[+3517.22767]TTK.A	N11(NGlycan / 3517.2277)	HexNAc(6)Hex(7)NeuAc(4)	2	2.96828e-06	2.50543e-05	5.52749	426.454	254.471	254.471	4	1244.26	1244	3.67565	4974.02	4973	P31596	EAA2_RAT Excitatory amino acid transporter 2 OS=Rattus norvegicus OX=10116 GN=Slc1a2 PE=1 SV=2	195	49.0134	14304		9.20788e-08	7.69648e-07
K.VLVAPPSEEAN[+3372.19016]TTK.A	N11(NGlycan / 3372.1902)	HexNAc(6)Hex(7)Fuc(1)NeuAc(3)	4	4.96477e-06	4.19054e-05	5.3041	471.56	220.288	220.288	4	1208	1207.75	3.69917	4828.98	4827.96	P31596	EAA2_RAT Excitatory amino acid transporter 2 OS=Rattus norvegicus OX=10116 GN=Slc1a2 PE=1 SV=2	195	46.0823	13224		1.55345e-07	1.16117e-06
K.VLVAPPSEEAN[+3226.13225]TTK.A	N11(NGlycan / 3226.1323)	HexNAc(6)Hex(7)NeuAc(3)	7	7.41769e-06	6.26084e-05	5.12973	440.754	201.282	201.282	3	1561.65	1561.31	3.91882	4682.92	4681.9	P31596	EAA2_RAT Excitatory amino acid transporter 2 OS=Rattus norvegicus OX=10116 GN=Slc1a2 PE=1 SV=2	195	45.9773	13190		2.74217e-07	2.1199e-06
K.VLVAPPSEEAN[+3081.09474]TTK.A	N11(NGlycan / 3081.0947)	HexNAc(6)Hex(7)Fuc(1)NeuAc(2)	4	1.47239e-06	1.24281e-05	5.83198	567.03	286.271	286.271	3	1513.3	1512.96	4.45478	4537.89	4536.86	P31596	EAA2_RAT Excitatory amino acid transporter 2 OS=Rattus norvegicus OX=10116 GN=Slc1a2 PE=1 SV=2	195	41.5766	11466		3.88273e-08	3.37943e-07
K.VLVAPPSEEAN[+3007.05796]TTK.A	N11(NGlycan / 3007.058)	HexNAc(5)Hex(6)Fuc(1)NeuAc(3)	9	6.23049e-08	5.25904e-07	7.20548	575.332	312	312	3	1488.28	1488.28	0.310398	4462.83	4462.83	P31596	EAA2_RAT Excitatory amino acid transporter 2 OS=Rattus norvegicus OX=10116 GN=Slc1a2 PE=1 SV=2	195	50.7831	14959		1.14009e-09	9.38734e-09
K.VLVAPPSEEAN[+2935.03683]TTK.A	N11(NGlycan / 2935.0368)	HexNAc(6)Hex(7)NeuAc(2)	1	2.05565e-05	0.000173491	4.68705	474.478	292.996	292.996	3	1464.62	1464.27	8.31138	4391.85	4390.81	P31596	EAA2_RAT Excitatory amino acid transporter 2 OS=Rattus norvegicus OX=10116 GN=Slc1a2 PE=1 SV=2	195	42.0818	11668		6.72625e-07	5.05731e-06
K.VLVAPPSEEAN[+2861.00005]TTK.A	N11(NGlycan / 2861.0001)	HexNAc(5)Hex(6)NeuAc(3)	9	3.72913e-07	3.14768e-06	6.42839	548.146	320.786	320.786	3	1439.93	1439.59	3.34399	4317.79	4316.77	P31596	EAA2_RAT Excitatory amino acid transporter 2 OS=Rattus norvegicus OX=10116 GN=Slc1a2 PE=1 SV=2	195	49.4904	14481		8.12294e-09	6.93853e-08
K.VLVAPPSEEAN[+2715.96255]TTK.A	N11(NGlycan / 2715.9625)	HexNAc(5)Hex(6)Fuc(1)NeuAc(2)	10	4.19612e-12	3.54187e-11	11.3772	669.338	401.674	401.674	3	1391.25	1391.25	1.96054	4171.74	4171.73	P31596	EAA2_RAT Excitatory amino acid transporter 2 OS=Rattus norvegicus OX=10116 GN=Slc1a2 PE=1 SV=2	195	46.7908	13491		1.86354e-13	1.50123e-12
K.VLVAPPSEEAN[+2610.93119]TTK.A	N11(NGlycan / 2610.9312)	HexNAc(6)Hex(5)NeuAc(2)	1	2.14558e-06	1.81102e-05	5.66846	492.608	269.033	269.033	3	1356.58	1356.24	3.16428	4067.72	4066.7	P31596	EAA2_RAT Excitatory amino acid transporter 2 OS=Rattus norvegicus OX=10116 GN=Slc1a2 PE=1 SV=2	195	42.98	12012		5.8413e-08	5.08135e-07
K.VLVAPPSEEAN[+2569.90464]TTK.A	N11(NGlycan / 2569.9046)	HexNAc(5)Hex(6)NeuAc(2)	6	5.36022e-07	4.52445e-06	6.27082	536.306	317.055	317.055	3	1342.9	1342.56	3.27204	4026.69	4025.67	P31596	EAA2_RAT Excitatory amino acid transporter 2 OS=Rattus norvegicus OX=10116 GN=Slc1a2 PE=1 SV=2	195	43.0089	12025		1.27062e-08	1.10154e-07
K.VLVAPPSEEAN[+2553.90972]TTK.A	N11(NGlycan / 2553.9097)	HexNAc(5)Hex(5)Fuc(1)NeuAc(2)	1	6.50473e-08	5.49052e-07	7.18677	561.459	300.397	300.397	3	1337.23	1337.23	-0.586619	4009.68	4009.68	P31596	EAA2_RAT Excitatory amino acid transporter 2 OS=Rattus norvegicus OX=10116 GN=Slc1a2 PE=1 SV=2	195	47.6015	13787		1.25586e-09	9.61905e-09
K.VLVAPPSEEAN[+2350.83035]TTK.A	N11(NGlycan / 2350.8304)	HexNAc(4)Hex(5)Fuc(1)NeuAc(2)	1	9.44104e-08	7.96901e-07	7.02498	524.619	361.968	361.968	3	1269.54	1269.54	0.254991	3806.6	3806.6	P31596	EAA2_RAT Excitatory amino acid transporter 2 OS=Rattus norvegicus OX=10116 GN=Slc1a2 PE=1 SV=2	195	46.9047	13535		1.8863e-09	1.49491e-08
K.AVISLLN[+3663.28558]ETMNEAPEETK.I	N7(NGlycan / 3663.2856)	HexNAc(6)Hex(7)Fuc(1)NeuAc(4)	2	4.18879e-09	3.53568e-08	8.37791	571.973	440.748	440.748	4	1414.08	1413.82	3.05914	5653.29	5652.27	P31596	EAA2_RAT Excitatory amino acid transporter 2 OS=Rattus norvegicus OX=10116 GN=Slc1a2 PE=1 SV=2	209	97.276	37762		5.90027e-11	5.01775e-10
K.AVISLLN[+3517.22767]ETM[+15.99492]NEAPEETK.I	N7(NGlycan / 3517.2277); M10(Oxidation / 15.9949)	HexNAc(6)Hex(7)NeuAc(4)	4	3.7195e-08	3.13956e-07	7.42952	567.755	370.168	370.168	4	1381.56	1381.31	1.27535	5523.22	5522.21	P31596	EAA2_RAT Excitatory amino acid transporter 2 OS=Rattus norvegicus OX=10116 GN=Slc1a2 PE=1 SV=2	209	82.1363	29698		6.83086e-10	5.8507e-09
K.AVISLLN[+3517.22767]ETMNEAPEETK.I	N7(NGlycan / 3517.2277)	HexNAc(6)Hex(7)NeuAc(4)	2	3.50097e-07	2.9551e-06	6.45581	473.278	364.793	364.793	4	1377.31	1377.31	2.91579	5506.23	5506.21	P31596	EAA2_RAT Excitatory amino acid transporter 2 OS=Rattus norvegicus OX=10116 GN=Slc1a2 PE=1 SV=2	209	97.3937	37828		7.86888e-09	6.68747e-08
K.AVISLLN[+3372.19016]ETMNEAPEETK.I	N7(NGlycan / 3372.1902)	HexNAc(6)Hex(7)Fuc(1)NeuAc(3)	2	1.12102e-08	9.46233e-08	7.95039	536.653	443.88	443.88	4	1341.3	1341.05	2.80749	5362.19	5361.17	P31596	EAA2_RAT Excitatory amino acid transporter 2 OS=Rattus norvegicus OX=10116 GN=Slc1a2 PE=1 SV=2	209	92.028	34953		2.61204e-10	2.37542e-09
K.AVISLLN[+3226.13225]ETMNEAPEETK.I	N7(NGlycan / 3226.1323)	HexNAc(6)Hex(7)NeuAc(3)	3	2.37686e-11	2.00626e-10	10.624	604.373	411.753	411.753	4	1304.79	1304.53	1.91214	5216.13	5215.12	P31596	EAA2_RAT Excitatory amino acid transporter 2 OS=Rattus norvegicus OX=10116 GN=Slc1a2 PE=1 SV=2	209	92.3006	35102		8.21372e-13	6.55376e-12
K.AVISLLN[+3007.05796]ETMNEAPEETK.I	N7(NGlycan / 3007.058)	HexNAc(5)Hex(6)Fuc(1)NeuAc(3)	2	1.12102e-08	9.46233e-08	7.95039	533.711	422.816	422.816	4	1250.02	1249.77	2.79157	4997.06	4996.04	P31596	EAA2_RAT Excitatory amino acid transporter 2 OS=Rattus norvegicus OX=10116 GN=Slc1a2 PE=1 SV=2	209	91.7303	34793		2.5706e-10	2.33462e-09
K.AVISLLN[+2861.00005]ETM[+15.99492]NEAPEETK.I	N7(NGlycan / 2861.0001); M10(Oxidation / 15.9949)	HexNAc(5)Hex(6)NeuAc(3)	2	2.37056e-11	2.00095e-10	10.6251	647.417	486.468	486.468	4	1217.51	1217.25	3.502	4867	4865.98	P31596	EAA2_RAT Excitatory amino acid transporter 2 OS=Rattus norvegicus OX=10116 GN=Slc1a2 PE=1 SV=2	209	77.1418	27114		8.017e-13	6.35978e-12
K.AVISLLN[+2861.00005]ETMNEAPEETK.I	N7(NGlycan / 2861.0001)	HexNAc(5)Hex(6)NeuAc(3)	2	1.73111e-06	1.46118e-05	5.76168	461.457	349.462	349.462	4	1213.51	1213.25	5.78743	4851.02	4849.98	P31596	EAA2_RAT Excitatory amino acid transporter 2 OS=Rattus norvegicus OX=10116 GN=Slc1a2 PE=1 SV=2	209	91.7728	34818		4.62045e-08	4.00538e-07
K.AVISLLN[+2715.96255]ETM[+15.99492]NEAPEETK.I	N7(NGlycan / 2715.9625); M10(Oxidation / 15.9949)	HexNAc(5)Hex(6)Fuc(1)NeuAc(2)	2	6.79616e-08	5.73652e-07	7.16774	512.761	426.593	426.593	3	1574.33	1574.32	4.54967	4720.96	4720.94	P31596	EAA2_RAT Excitatory amino acid transporter 2 OS=Rattus norvegicus OX=10116 GN=Slc1a2 PE=1 SV=2	209	71.8668	24324		1.2803e-09	9.86113e-09
K.AVISLLN[+2715.96255]ETMNEAPEETK.I	N7(NGlycan / 2715.9625)	HexNAc(5)Hex(6)Fuc(1)NeuAc(2)	4	3.15047e-11	2.65925e-10	10.5016	622.721	460.835	460.835	3	1568.99	1568.99	2.29088	4704.96	4704.95	P31596	EAA2_RAT Excitatory amino acid transporter 2 OS=Rattus norvegicus OX=10116 GN=Slc1a2 PE=1 SV=2	209	92.1918	35041		1.08435e-12	8.26235e-12
K.AVISLLN[+2569.90464]ETMNEAPEETK.I	N7(NGlycan / 2569.9046)	HexNAc(5)Hex(6)NeuAc(2)	1	2.72244e-06	2.29792e-05	5.56504	413.134	278.756	238.522	3	1520.31	1520.3	2.89421	4558.9	4558.89	P31596	EAA2_RAT Excitatory amino acid transporter 2 OS=Rattus norvegicus OX=10116 GN=Slc1a2 PE=1 SV=2	209	86.6899	32125		8.12714e-08	6.71995e-07
K.TENLDVIVN[+1540.52851]ISDTESWDQHVQK.L	N9(NGlycan / 1540.5285)	HexNAc(2)Hex(7)	4	1.15637e-22	9.76069e-22	21.9369	1175.7	893.027	893.027	4	1028.7	1028.45	-1.27428	4111.76	4110.77	P13638	AT1B2_RAT Sodium/potassium-transporting ATPase subunit beta-2 OS=Rattus norvegicus OX=10116 GN=Atp1b2 PE=1 SV=1	88	88.3471	32999		1.21696e-23	9.93514e-23
K.TENLDVIVN[+1378.47569]ISDTESWDQHVQK.L	N9(NGlycan / 1378.4757)	HexNAc(2)Hex(6)	6	1.37123e-22	1.15743e-21	21.8629	1150.22	999.281	999.281	3	1316.91	1316.91	-0.40462	3948.71	3948.71	P13638	AT1B2_RAT Sodium/potassium-transporting ATPase subunit beta-2 OS=Rattus norvegicus OX=10116 GN=Atp1b2 PE=1 SV=1	88	88.4873	33071		1.34323e-23	1.11178e-22
K.FLEPYN[+1540.52851]DSIQAQK.N	N6(NGlycan / 1540.5285)	HexNAc(2)Hex(7)	3	1.35908e-20	1.14718e-19	19.8668	1078.67	773.577	773.577	3	1031.77	1031.77	-1.31187	3093.29	3093.29	P13638	AT1B2_RAT Sodium/potassium-transporting ATPase subunit beta-2 OS=Rattus norvegicus OX=10116 GN=Atp1b2 PE=1 SV=1	113	56.7027	17297		1.41831e-21	1.19474e-20
K.FLEPYN[+1378.47569]DSIQAQK.N	N6(NGlycan / 1378.4757)	HexNAc(2)Hex(6)	5	1.35908e-20	1.14718e-19	19.8668	1095.12	793.612	793.612	3	977.751	977.751	-0.791785	2931.24	2931.24	P13638	AT1B2_RAT Sodium/potassium-transporting ATPase subunit beta-2 OS=Rattus norvegicus OX=10116 GN=Atp1b2 PE=1 SV=1	113	56.9022	17385		1.4441e-21	1.21864e-20
K.FLEPYN[+1216.42286]DSIQAQK.N	N6(NGlycan / 1216.4229)	HexNAc(2)Hex(5)	7	1.30179e-18	1.09881e-17	17.8855	977.917	684.927	684.927	3	923.733	923.734	-0.475324	2769.19	2769.19	P13638	AT1B2_RAT Sodium/potassium-transporting ATPase subunit beta-2 OS=Rattus norvegicus OX=10116 GN=Atp1b2 PE=1 SV=1	113	57.3886	17595		1.35448e-19	1.13263e-18
K.FLEPYN[+1054.37004]DSIQAQK.N	N6(NGlycan / 1054.37)	HexNAc(2)Hex(4)	1	1.35908e-19	1.14718e-18	18.8668	1023.56	805.035	805.035	3	869.716	869.716	-0.821846	2607.13	2607.13	P13638	AT1B2_RAT Sodium/potassium-transporting ATPase subunit beta-2 OS=Rattus norvegicus OX=10116 GN=Atp1b2 PE=1 SV=1	113	57.5306	17660		1.44592e-20	1.16361e-19
K.FLEPYN[+730.26439]DSIQAQK.N	N6(NGlycan / 730.2644)	HexNAc(2)Hex(2)	1	1.68256e-12	1.42022e-11	11.774	687.451	469.671	469.671	2	1142.02	1142.02	-1.44278	2283.03	2283.03	P13638	AT1B2_RAT Sodium/potassium-transporting ATPase subunit beta-2 OS=Rattus norvegicus OX=10116 GN=Atp1b2 PE=1 SV=1	113	57.6789	17725		8.45588e-14	6.91731e-13
R.TQLGN[+1955.72397]C[+57.02146]SGIGDPTHYGYSTGQPC[+57.02146]VFIK.M	N5(NGlycan / 1955.724)	HexNAc(5)Hex(4)Fuc(2)	1	3.63344e-07	3.06691e-06	6.43968	487.293	309.825	309.825	4	1229.28	1229.03	1.76747	4914.09	4913.08	P13638	AT1B2_RAT Sodium/potassium-transporting ATPase subunit beta-2 OS=Rattus norvegicus OX=10116 GN=Atp1b2 PE=1 SV=1	155	75.848	26444	C6(Carbamidomethyl / 57.0215); C23(Carbamidomethyl / 57.0215)	7.99427e-09	6.81138e-08
R.TQLGN[+1216.42286]C[+57.02146]SGIGDPTHYGYSTGQPC[+57.02146]VFIK.M	N5(NGlycan / 1216.4229)	HexNAc(2)Hex(5)	6	1.02181e-23	8.62489e-23	22.9906	1212.94	963.437	963.437	3	1391.93	1391.93	-0.645193	4173.78	4173.78	P13638	AT1B2_RAT Sodium/potassium-transporting ATPase subunit beta-2 OS=Rattus norvegicus OX=10116 GN=Atp1b2 PE=1 SV=1	155	76.539	26802	C6(Carbamidomethyl / 57.0215); C23(Carbamidomethyl / 57.0215)	1.01219e-24	8.88276e-24
K.FHVN[+1540.52851]YTQPLVAVK.F	N4(NGlycan / 1540.5285)	HexNAc(2)Hex(7)	1	1.68256e-16	1.42022e-15	15.774	885.766	692.812	692.812	3	1019.46	1019.46	-0.965986	3056.36	3056.36	P13638	AT1B2_RAT Sodium/potassium-transporting ATPase subunit beta-2 OS=Rattus norvegicus OX=10116 GN=Atp1b2 PE=1 SV=1	235	65.9923	21462		1.58104e-17	1.24486e-16
K.FHVN[+1378.47569]YTQPLVAVK.F	N4(NGlycan / 1378.4757)	HexNAc(2)Hex(6)	3	1.68256e-18	1.42022e-17	17.774	978.573	744.754	744.754	3	965.44	965.441	-1.05254	2894.3	2894.31	P13638	AT1B2_RAT Sodium/potassium-transporting ATPase subunit beta-2 OS=Rattus norvegicus OX=10116 GN=Atp1b2 PE=1 SV=1	235	66.2479	21577		1.78613e-19	1.52369e-18
K.FLN[+2407.85181]VTPNVEVNVEC[+57.02146]R.I	N3(NGlycan / 2407.8518)	HexNAc(5)Hex(5)NeuAc(2)	2	1.38365e-11	1.16791e-10	10.859	696.8	432.178	432.178	3	1399.93	1399.92	6.14458	4197.77	4197.74	P13638	AT1B2_RAT Sodium/potassium-transporting ATPase subunit beta-2 OS=Rattus norvegicus OX=10116 GN=Atp1b2 PE=1 SV=1	248	78.5376	27854	C14(Carbamidomethyl / 57.0215)	4.14868e-13	3.01937e-12
K.FLN[+1955.72397]VTPNVEVNVEC[+57.02146]R.I	N3(NGlycan / 1955.724)	HexNAc(5)Hex(4)Fuc(2)	1	1.30179e-13	1.09881e-12	12.8855	730.149	472.976	472.976	3	1249.21	1249.21	0.474406	3745.62	3745.61	P13638	AT1B2_RAT Sodium/potassium-transporting ATPase subunit beta-2 OS=Rattus norvegicus OX=10116 GN=Atp1b2 PE=1 SV=1	248	74.2023	25597	C14(Carbamidomethyl / 57.0215)	5.67631e-15	4.58778e-14
R.FKLDWLGN[+1955.72397]C[+57.02146]SGLNDESYGYK.E	N8(NGlycan / 1955.724)	HexNAc(5)Hex(4)Fuc(2)	2	1.61587e-07	1.36392e-06	6.79159	538.983	363.131	363.131	3	1441.27	1441.27	-0.763817	4321.8	4321.8	P07340	AT1B1_RAT Sodium/potassium-transporting ATPase subunit beta-1 OS=Rattus norvegicus OX=10116 GN=Atp1b1 PE=1 SV=1	151	89.9362	33841	C9(Carbamidomethyl / 57.0215)	3.5902e-09	2.8449e-08
R.FKLDWLGN[+1647.61324]C[+57.02146]SGLNDESYGYK.E	N8(NGlycan / 1647.6132)	HexNAc(5)Hex(3)Fuc(1)	1	2.22807e-12	1.88067e-11	11.6521	689.349	480.986	480.986	3	1338.57	1338.57	-1.03171	4013.68	4013.69	P07340	AT1B1_RAT Sodium/potassium-transporting ATPase subunit beta-1 OS=Rattus norvegicus OX=10116 GN=Atp1b1 PE=1 SV=1	151	90.6822	34238	C9(Carbamidomethyl / 57.0215)	1.0965e-13	8.93305e-13
K.LDWLGN[+2610.93119]C[+57.02146]SGLNDESYGYK.E	N6(NGlycan / 2610.9312)	HexNAc(6)Hex(5)NeuAc(2)	3	3.14212e-12	2.65221e-11	11.5028	683.939	502.971	502.971	3	1568.29	1567.95	3.90272	4702.87	4701.84	P07340	AT1B1_RAT Sodium/potassium-transporting ATPase subunit beta-1 OS=Rattus norvegicus OX=10116 GN=Atp1b1 PE=1 SV=1	153	86.5863	32065	C7(Carbamidomethyl / 57.0215)	1.40519e-13	1.0681e-12
K.LDWLGN[+2465.89368]C[+57.02146]SGLNDESYGYK.E	N6(NGlycan / 2465.8937)	HexNAc(6)Hex(5)Fuc(1)NeuAc(1)	2	1.81927e-10	1.53562e-09	9.7401	596.227	507.635	507.635	3	1519.94	1519.61	1.62302	4557.82	4556.81	P07340	AT1B1_RAT Sodium/potassium-transporting ATPase subunit beta-1 OS=Rattus norvegicus OX=10116 GN=Atp1b1 PE=1 SV=1	153	81.0526	29130	C7(Carbamidomethyl / 57.0215)	4.16297e-12	3.24466e-11
K.LDWLGN[+2100.76148]C[+57.02146]SGLNDESYGYK.E	N6(NGlycan / 2100.7615)	HexNAc(5)Hex(4)Fuc(1)NeuAc(1)	2	8.22094e-07	6.93912e-06	6.08508	527.818	332.66	332.66	3	1397.57	1397.9	2.98517	4190.68	4191.67	P07340	AT1B1_RAT Sodium/potassium-transporting ATPase subunit beta-1 OS=Rattus norvegicus OX=10116 GN=Atp1b1 PE=1 SV=1	153	88.0342	32834	C7(Carbamidomethyl / 57.0215)	2.01469e-08	1.74325e-07
K.LDWLGN[+1955.72397]C[+57.02146]SGLNDESYGYK.E	N6(NGlycan / 1955.724)	HexNAc(5)Hex(4)Fuc(2)	4	1.81927e-13	1.53562e-12	12.7401	710.064	618.676	618.676	3	1349.55	1349.55	0.853233	4046.64	4046.64	P07340	AT1B1_RAT Sodium/potassium-transporting ATPase subunit beta-1 OS=Rattus norvegicus OX=10116 GN=Atp1b1 PE=1 SV=1	153	82.1266	29693	C7(Carbamidomethyl / 57.0215)	1.07418e-14	8.66863e-14
K.LDWLGN[+1647.61324]C[+57.02146]SGLNDESYGYK.E	N6(NGlycan / 1647.6132)	HexNAc(5)Hex(3)Fuc(1)	1	9.77387e-17	8.24995e-16	16.0099	862.106	789.486	789.486	3	1246.85	1246.85	-0.182711	3738.52	3738.53	P07340	AT1B1_RAT Sodium/potassium-transporting ATPase subunit beta-1 OS=Rattus norvegicus OX=10116 GN=Atp1b1 PE=1 SV=1	153	82.867	30065	C7(Carbamidomethyl / 57.0215)	6.65901e-18	5.07152e-17
K.VFFGEHVHGATIN[+3007.05796]FTMENQIHQHGK.L	N13(NGlycan / 3007.058)	HexNAc(5)Hex(6)Fuc(1)NeuAc(3)	5	2.07711e-05	0.000175302	4.68254	482.109	150.797	150.797	5	1177.89	1177.89	0.144127	5885.44	5885.44	Q63564	SV2B_RAT Synaptic vesicle glycoprotein 2B OS=Rattus norvegicus OX=10116 GN=Sv2b PE=1 SV=1	429	80.2411	28711		6.7884e-07	5.11949e-06
K.VFFGEHVHGATIN[+2861.00005]FTM[+15.99492]ENQIHQHGK.L	N13(NGlycan / 2861.0001); M16(Oxidation / 15.9949)	HexNAc(5)Hex(6)NeuAc(3)	1	5.51464e-06	4.65465e-05	5.25848	531.732	289.564	289.564	5	1152.09	1151.88	2.72568	5756.4	5755.38	Q63564	SV2B_RAT Synaptic vesicle glycoprotein 2B OS=Rattus norvegicus OX=10116 GN=Sv2b PE=1 SV=1	429	67.8149	22290		1.76834e-07	1.37493e-06
K.VFFGEHVHGATIN[+2861.00005]FTMENQIHQHGK.L	N13(NGlycan / 2861.0001)	HexNAc(5)Hex(6)NeuAc(3)	2	1.05128e-07	8.87363e-07	6.97828	590.473	317.709	317.709	5	1148.49	1148.68	3.25036	5738.4	5739.38	Q63564	SV2B_RAT Synaptic vesicle glycoprotein 2B OS=Rattus norvegicus OX=10116 GN=Sv2b PE=1 SV=1	429	75.3912	26212		2.10343e-09	1.63889e-08
K.VFFGEHVHGATIN[+2610.93119]FTM[+15.99492]ENQIHQHGK.L	N13(NGlycan / 2610.9312); M16(Oxidation / 15.9949)	HexNAc(6)Hex(5)NeuAc(2)	4	1.9844e-10	1.675e-09	9.70237	617.569	406.425	406.425	5	1102.07	1101.87	2.60919	5506.33	5505.31	Q63564	SV2B_RAT Synaptic vesicle glycoprotein 2B OS=Rattus norvegicus OX=10116 GN=Sv2b PE=1 SV=1	429	64.2191	20653		4.55152e-12	3.55441e-11
K.VFFGEHVHGATIN[+2610.93119]FTMENQIHQHGK.L	N13(NGlycan / 2610.9312)	HexNAc(6)Hex(5)NeuAc(2)	5	6.70287e-15	5.65777e-14	14.1737	855.295	548.458	548.458	5	1098.67	1098.67	4.83675	5489.34	5489.32	Q63564	SV2B_RAT Synaptic vesicle glycoprotein 2B OS=Rattus norvegicus OX=10116 GN=Sv2b PE=1 SV=1	429	71.4873	24102		3.48599e-16	2.90744e-15
K.VFFGEHVHGATIN[+2319.83577]FTMENQIHQHGK.L	N13(NGlycan / 2319.8358)	HexNAc(6)Hex(5)NeuAc(1)	1	4.04341e-06	3.41288e-05	5.39325	488.743	241.103	241.103	5	1040.45	1040.45	0.14452	5198.22	5198.22	Q63564	SV2B_RAT Synaptic vesicle glycoprotein 2B OS=Rattus norvegicus OX=10116 GN=Sv2b PE=1 SV=1	429	68.7312	22731		1.27198e-07	9.93294e-07
R.FIN[+2303.84086]STFLEQK.E	N3(NGlycan / 2303.8409)	HexNAc(6)Hex(4)Fuc(1)NeuAc(1)	1	1.44428e-09	1.21909e-08	8.84035	637.362	269.806	269.806	3	1177.5	1177.5	-0.231348	3530.48	3530.48	Q63564	SV2B_RAT Synaptic vesicle glycoprotein 2B OS=Rattus norvegicus OX=10116 GN=Sv2b PE=1 SV=1	514	69.862	23295		2.49612e-11	2.19035e-10
R.FIN[+1955.72397]STFLEQK.E	N3(NGlycan / 1955.724)	HexNAc(5)Hex(4)Fuc(2)	3	6.1655e-11	5.20419e-10	10.21	650.425	351.257	351.257	3	1061.46	1061.46	-0.725272	3182.36	3182.37	Q63564	SV2B_RAT Synaptic vesicle glycoprotein 2B OS=Rattus norvegicus OX=10116 GN=Sv2b PE=1 SV=1	514	63.0365	20125		1.71917e-12	1.34213e-11
R.FN[+1216.42286]STEYQVVTR.V	N2(NGlycan / 1216.4229)	HexNAc(2)Hex(5)	1	1.3774e-06	1.16263e-05	5.86094	404.482	301.791	301.791	2	1280.54	1280.54	-1.12241	2560.08	2560.08	Q91ZX7	LRP1_MOUSE Prolow-density lipoprotein receptor-related protein 1 OS=Mus musculus OX=10090 GN=Lrp1 PE=1 SV=1	446	52.0749	15459		3.40691e-08	2.91001e-07
K.LTSC[+57.02146]ATN[+1647.61324]ASM[+15.99492]C[+57.02146]GDEAR.C	N7(NGlycan / 1647.6132); M10(Oxidation / 15.9949)	HexNAc(5)Hex(3)Fuc(1)	1	3.0231e-07	2.55174e-06	6.51955	449.364	368.007	368.007	3	1136.45	1136.44	1.77867	3407.32	3407.32	Q91ZX7	LRP1_MOUSE Prolow-density lipoprotein receptor-related protein 1 OS=Mus musculus OX=10090 GN=Lrp1 PE=1 SV=1	3783	25.0551	6352	C4(Carbamidomethyl / 57.0215); C11(Carbamidomethyl / 57.0215)	6.15425e-09	5.22e-08
K.LTSC[+57.02146]ATN[+1647.61324]ASMC[+57.02146]GDEAR.C	N7(NGlycan / 1647.6132)	HexNAc(5)Hex(3)Fuc(1)	1	3.07869e-09	2.59866e-08	8.51163	559.407	467.229	467.229	3	1131.11	1131.11	0.467623	3391.32	3391.32	Q91ZX7	LRP1_MOUSE Prolow-density lipoprotein receptor-related protein 1 OS=Mus musculus OX=10090 GN=Lrp1 PE=1 SV=1	3783	33.0208	8686	C4(Carbamidomethyl / 57.0215); C11(Carbamidomethyl / 57.0215)	4.42869e-11	3.56138e-10
K.QTGDVTC[+57.02146]N[+1647.61324]C[+57.02146]TDGR.V	N8(NGlycan / 1647.6132)	HexNAc(5)Hex(3)Fuc(1)	1	8.18601e-06	6.9093e-05	5.08693	481.413	145.138	145.138	3	1044.41	1044.41	1.15106	3131.21	3131.2	Q91ZX7	LRP1_MOUSE Prolow-density lipoprotein receptor-related protein 1 OS=Mus musculus OX=10090 GN=Lrp1 PE=1 SV=1	4358	19.89	4935	C7(Carbamidomethyl / 57.0215); C9(Carbamidomethyl / 57.0215)	3.00561e-07	2.33506e-06
R.LSVEC[+57.02146]AN[+2262.81431]KTESALNIEVEFEYPFR.L	N7(NGlycan / 2262.8143)	HexNAc(5)Hex(5)Fuc(1)NeuAc(1)	2	3.03756e-06	2.5639e-05	5.51748	433.014	332.566	332.566	4	1278.06	1277.8	2.05122	5109.2	5108.19	P07825	SYPH_RAT Synaptophysin OS=Rattus norvegicus OX=10116 GN=Syp PE=1 SV=1	47	100.704	39996	C5(Carbamidomethyl / 57.0215)	9.49893e-08	7.98398e-07
R.LSVEC[+57.02146]AN[+2391.85690]K.T	N7(NGlycan / 2391.8569)	HexNAc(5)Hex(4)Fuc(1)NeuAc(2)	2	7.82811e-07	6.60753e-06	6.10634	457.567	335.605	335.605	3	1104.77	1104.77	0.613645	3312.31	3312.31	P07825	SYPH_RAT Synaptophysin OS=Rattus norvegicus OX=10116 GN=Syp PE=1 SV=1	47	31.3184	8190	C5(Carbamidomethyl / 57.0215)	1.8516e-08	1.60882e-07
R.LSVEC[+57.02146]AN[+2188.77753]K.T	N7(NGlycan / 2188.7775)	HexNAc(4)Hex(4)Fuc(1)NeuAc(2)	4	3.03587e-06	2.56247e-05	5.51772	445.093	290.619	290.619	3	1037.08	1037.08	0.662378	3109.23	3109.23	P07825	SYPH_RAT Synaptophysin OS=Rattus norvegicus OX=10116 GN=Syp PE=1 SV=1	47	31.2882	8181	C5(Carbamidomethyl / 57.0215)	9.40153e-08	7.88778e-07
R.LSVEC[+57.02146]AN[+2100.76148]K.T	N7(NGlycan / 2100.7615)	HexNAc(5)Hex(4)Fuc(1)NeuAc(1)	4	3.65536e-06	3.08535e-05	5.43707	437.156	290.024	290.024	3	1007.74	1007.74	0.860775	3021.21	3021.21	P07825	SYPH_RAT Synaptophysin OS=Rattus norvegicus OX=10116 GN=Syp PE=1 SV=1	47	26.9202	6886	C5(Carbamidomethyl / 57.0215)	1.1344e-07	8.93336e-07
R.LSVEC[+57.02146]AN[+1955.72397]K.T	N7(NGlycan / 1955.724)	HexNAc(5)Hex(4)Fuc(2)	2	2.73952e-06	2.31234e-05	5.56233	414.906	272.758	272.758	2	1438.59	1438.59	0.559233	2876.18	2876.17	P07825	SYPH_RAT Synaptophysin OS=Rattus norvegicus OX=10116 GN=Syp PE=1 SV=1	47	23.1006	5814	C5(Carbamidomethyl / 57.0215)	8.21551e-08	6.80731e-07
R.LSVEC[+57.02146]AN[+1809.66607]K.T	N7(NGlycan / 1809.6661)	HexNAc(5)Hex(4)Fuc(1)	2	1.11013e-06	9.3703e-06	5.95463	416.525	320.692	320.692	3	910.71	910.71	-0.113701	2730.12	2730.12	P07825	SYPH_RAT Synaptophysin OS=Rattus norvegicus OX=10116 GN=Syp PE=1 SV=1	47	23.1819	5836	C5(Carbamidomethyl / 57.0215)	2.70975e-08	2.39343e-07
R.LSVEC[+57.02146]AN[+1752.64460]K.T	N7(NGlycan / 1752.6446)	HexNAc(4)Hex(4)Fuc(2)	2	5.32884e-06	4.49783e-05	5.27337	413.209	285.911	285.911	2	1337.05	1337.05	0.794448	2673.1	2673.1	P07825	SYPH_RAT Synaptophysin OS=Rattus norvegicus OX=10116 GN=Syp PE=1 SV=1	47	21.7779	5451	C5(Carbamidomethyl / 57.0215)	1.66583e-07	1.273e-06
R.LSVEC[+57.02146]AN[+1647.61324]K.T	N7(NGlycan / 1647.6132)	HexNAc(5)Hex(3)Fuc(1)	4	1.85714e-07	1.56758e-06	6.73116	539.702	375.541	375.541	3	856.693	856.693	0.484237	2568.07	2568.06	P07825	SYPH_RAT Synaptophysin OS=Rattus norvegicus OX=10116 GN=Syp PE=1 SV=1	47	24.4895	6196	C5(Carbamidomethyl / 57.0215)	3.9535e-09	3.14658e-08
R.LSVEC[+57.02146]AN[+1444.53387]K.T	N7(NGlycan / 1444.5339)	HexNAc(4)Hex(3)Fuc(1)	3	2.73952e-06	2.31234e-05	5.56233	404.25	268.383	268.383	2	1183	1183	0.439579	2364.99	2364.98	P07825	SYPH_RAT Synaptophysin OS=Rattus norvegicus OX=10116 GN=Syp PE=1 SV=1	47	23.1557	5829	C5(Carbamidomethyl / 57.0215)	8.30382e-08	6.8946e-07
R.VDHESLN[+2262.81431]ATPQVAMQVLEIHYTPSVK.I	N7(NGlycan / 2262.8143)	HexNAc(5)Hex(5)Fuc(1)NeuAc(1)	1	6.54822e-17	5.52724e-16	16.1839	904.496	614.924	614.924	4	1293.33	1293.08	3.19915	5170.31	5169.29	Q8BLQ9	CADM2_MOUSE Cell adhesion molecule 2 OS=Mus musculus OX=10090 GN=Cadm2 PE=1 SV=2	205	90.1014	33931		4.87762e-18	3.83393e-17
R.VDHESLN[+1955.72397]ATPQVAMQVLEIHYTPSVK.I	N7(NGlycan / 1955.724)	HexNAc(5)Hex(4)Fuc(2)	4	2.12655e-18	1.79498e-17	17.6723	970.825	681.788	681.788	4	1216.3	1216.3	-1.50007	4862.19	4862.2	Q8BLQ9	CADM2_MOUSE Cell adhesion molecule 2 OS=Mus musculus OX=10090 GN=Cadm2 PE=1 SV=2	205	90.4831	34140		2.20436e-19	1.86013e-18
R.VDHESLN[+1752.64460]ATPQVAMQVLEIHYTPSVK.I	N7(NGlycan / 1752.6446)	HexNAc(4)Hex(4)Fuc(2)	5	2.12655e-20	1.79498e-19	19.6723	1072.03	765.641	38.1775	4	1165.53	1165.53	-1.29767	4659.11	4659.12	Q8BLQ9	CADM2_MOUSE Cell adhesion molecule 2 OS=Mus musculus OX=10090 GN=Cadm2 PE=1 SV=2	205	90.7847	34292		2.27416e-21	1.82288e-20
R.VDHESLN[+1647.61324]ATPQVAMQVLEIHYTPSVK.I	N7(NGlycan / 1647.6132)	HexNAc(5)Hex(3)Fuc(1)	3	4.06083e-18	3.42767e-17	17.3914	993.861	690.746	690.746	4	1139.27	1139.28	-1.83959	4554.08	4554.08	Q8BLQ9	CADM2_MOUSE Cell adhesion molecule 2 OS=Mus musculus OX=10090 GN=Cadm2 PE=1 SV=2	205	91.1957	34510		3.76994e-19	3.0874e-18
R.VDHESLN[+1444.53387]ATPQVAMQVLEIHYTPSVK.I	N7(NGlycan / 1444.5339)	HexNAc(4)Hex(3)Fuc(1)	1	2.12655e-20	1.79498e-19	19.6723	1094.73	756.792	756.792	4	1088.51	1088.51	-1.18982	4351	4351.01	Q8BLQ9	CADM2_MOUSE Cell adhesion molecule 2 OS=Mus musculus OX=10090 GN=Cadm2 PE=1 SV=2	205	91.7428	34800		2.3123e-21	1.85871e-20
R.VELVAM[+15.99492]N[+1955.72397]ETDPK.S	M6(Oxidation / 15.9949); N7(NGlycan / 1955.724)	HexNAc(5)Hex(4)Fuc(2)	1	1.30179e-11	1.09881e-10	10.8855	640.081	504.966	504.966	3	1106.47	1106.47	0.0819913	3317.39	3317.39	Q00960	NMDE2_RAT Glutamate receptor ionotropic, NMDA 2B OS=Rattus norvegicus OX=10116 GN=Grin2b PE=1 SV=1	68	36.8962	9853		3.68625e-13	2.73456e-12
R.VELVAMN[+1955.72397]ETDPK.S	N7(NGlycan / 1955.724)	HexNAc(5)Hex(4)Fuc(2)	1	1.44159e-06	1.21681e-05	5.84116	407.351	259.111	259.111	3	1101.14	1101.14	-0.0528054	3301.39	3301.39	Q00960	NMDE2_RAT Glutamate receptor ionotropic, NMDA 2B OS=Rattus norvegicus OX=10116 GN=Grin2b PE=1 SV=1	68	51.217	15134		3.69009e-08	3.18944e-07
R.VELVAM[+15.99492]N[+1809.66607]ETDPK.S	M6(Oxidation / 15.9949); N7(NGlycan / 1809.6661)	HexNAc(5)Hex(4)Fuc(1)	1	1.18359e-08	9.99048e-08	7.9268	488.417	380.504	380.504	3	1057.78	1057.78	0.485677	3171.33	3171.33	Q00960	NMDE2_RAT Glutamate receptor ionotropic, NMDA 2B OS=Rattus norvegicus OX=10116 GN=Grin2b PE=1 SV=1	68	37.84	10164		2.78398e-10	2.50297e-09
R.VELVAMN[+1809.66607]ETDPK.S	N7(NGlycan / 1809.6661)	HexNAc(5)Hex(4)Fuc(1)	1	1.22783e-06	1.03638e-05	5.91086	419.666	286.181	286.181	3	1052.45	1052.45	-0.697861	3155.33	3155.33	Q00960	NMDE2_RAT Glutamate receptor ionotropic, NMDA 2B OS=Rattus norvegicus OX=10116 GN=Grin2b PE=1 SV=1	68	51.8819	15389		3.101e-08	2.74151e-07
R.VELVAM[+15.99492]N[+1647.61324]ETDPK.S	M6(Oxidation / 15.9949); N7(NGlycan / 1647.6132)	HexNAc(5)Hex(3)Fuc(1)	3	2.4231e-13	2.04529e-12	12.6156	721.796	601.155	601.155	3	1003.76	1003.76	0.906531	3009.28	3009.27	Q00960	NMDE2_RAT Glutamate receptor ionotropic, NMDA 2B OS=Rattus norvegicus OX=10116 GN=Grin2b PE=1 SV=1	68	38.0786	10246		1.47248e-14	1.19923e-13
R.VELVAMN[+1647.61324]ETDPK.S	N7(NGlycan / 1647.6132)	HexNAc(5)Hex(3)Fuc(1)	3	1.61162e-14	1.36034e-13	13.7927	768.41	599.015	599.015	2	1497.14	1497.14	0.134591	2993.28	2993.28	Q00960	NMDE2_RAT Glutamate receptor ionotropic, NMDA 2B OS=Rattus norvegicus OX=10116 GN=Grin2b PE=1 SV=1	68	52.4659	15611		1.01426e-15	7.93106e-15
R.YLIN[+1378.47569]VTFEGR.N	N4(NGlycan / 1378.4757)	HexNAc(2)Hex(6)	1	8.96838e-07	7.57001e-06	6.04729	479.768	329.939	329.939	2	1295.56	1295.56	-1.22642	2590.11	2590.12	Q00960	NMDE2_RAT Glutamate receptor ionotropic, NMDA 2B OS=Rattus norvegicus OX=10116 GN=Grin2b PE=1 SV=1	338	77.1139	27103		2.16031e-08	1.88693e-07
R.N[+1864.63416]LSFSEDGYQM[+15.99492]HPK.L	N1(NGlycan / 1864.6342); M11(Oxidation / 15.9949)	HexNAc(2)Hex(9)	1	1.68256e-12	1.42022e-11	11.774	652.384	515.579	515.579	3	1178.46	1178.46	-0.664255	3533.36	3533.37	Q00960	NMDE2_RAT Glutamate receptor ionotropic, NMDA 2B OS=Rattus norvegicus OX=10116 GN=Grin2b PE=1 SV=1	348	46.1908	13267		8.00489e-14	6.47603e-13
R.N[+1864.63416]LSFSEDGYQMHPK.L	N1(NGlycan / 1864.6342)	HexNAc(2)Hex(9)	1	1.68256e-13	1.42022e-12	12.774	720.233	542.668	542.668	3	1173.13	1173.13	-0.690054	3517.37	3517.37	Q00960	NMDE2_RAT Glutamate receptor ionotropic, NMDA 2B OS=Rattus norvegicus OX=10116 GN=Grin2b PE=1 SV=1	348	55.7591	16910		9.21773e-15	7.44016e-14
R.N[+1702.58133]LSFSEDGYQM[+15.99492]HPK.L	N1(NGlycan / 1702.5813); M11(Oxidation / 15.9949)	HexNAc(2)Hex(8)	1	1.68256e-12	1.42022e-11	11.774	674.086	528.001	528.001	3	1124.44	1124.44	-0.803749	3371.31	3371.31	Q00960	NMDE2_RAT Glutamate receptor ionotropic, NMDA 2B OS=Rattus norvegicus OX=10116 GN=Grin2b PE=1 SV=1	348	46.2686	13295		8.08023e-14	6.54978e-13
R.N[+1702.58133]LSFSEDGYQMHPK.L	N1(NGlycan / 1702.5813)	HexNAc(2)Hex(8)	1	1.61162e-13	1.36034e-12	12.7927	726.549	501.684	501.684	3	1119.11	1119.11	0.259976	3355.32	3355.32	Q00960	NMDE2_RAT Glutamate receptor ionotropic, NMDA 2B OS=Rattus norvegicus OX=10116 GN=Grin2b PE=1 SV=1	348	55.9156	16969		7.57604e-15	6.07996e-14
R.IISEN[+1647.61324]KTDEEPGYIK.K	N5(NGlycan / 1647.6132)	HexNAc(5)Hex(3)Fuc(1)	2	2.50826e-11	2.11717e-10	10.6006	603.341	507.296	507.296	3	1128.5	1128.5	-0.212858	3383.49	3383.49	Q00960	NMDE2_RAT Glutamate receptor ionotropic, NMDA 2B OS=Rattus norvegicus OX=10116 GN=Grin2b PE=1 SV=1	440	40.1893	10971		8.51682e-13	6.85251e-12
R.FGTVPN[+1216.42286]GSTER.N	N6(NGlycan / 1216.4229)	HexNAc(2)Hex(5)	3	3.11323e-07	2.62782e-06	6.50679	513.471	361.817	361.817	2	1191	1191	0.089796	2380.99	2380.99	Q00960	NMDE2_RAT Glutamate receptor ionotropic, NMDA 2B OS=Rattus norvegicus OX=10116 GN=Grin2b PE=1 SV=1	683	32.8386	8629		6.26247e-09	5.32696e-08
R.NN[+3663.28558]VTEIQGIPGAASGLIK.E	N2(NGlycan / 3663.2856)	HexNAc(6)Hex(7)Fuc(1)NeuAc(4)	1	5.59232e-08	4.72038e-07	7.25241	541.14	349.618	349.618	4	1362.07	1362.07	-0.490423	5445.26	5445.26	Q63633	S12A5_RAT Solute carrier family 12 member 5 OS=Rattus norvegicus OX=10116 GN=Slc12a5 PE=1 SV=2	361	96.9997	37601		9.89277e-10	8.52157e-09
R.NN[+3372.19016]VTEIQGIPGAASGLIK.E	N2(NGlycan / 3372.1902)	HexNAc(6)Hex(7)Fuc(1)NeuAc(3)	3	1.86799e-05	0.000157655	4.72863	420.301	215.535	215.535	4	1289.04	1289.3	-4.84901	5153.14	5154.17	Q63633	S12A5_RAT Solute carrier family 12 member 5 OS=Rattus norvegicus OX=10116 GN=Slc12a5 PE=1 SV=2	361	91.8622	34866		6.19554e-07	4.70299e-06
R.NN[+3007.05796]VTEIQGIPGAASGLIK.E	N2(NGlycan / 3007.058)	HexNAc(5)Hex(6)Fuc(1)NeuAc(3)	4	1.94856e-15	1.64475e-14	14.7103	818.09	574.184	574.184	3	1597.01	1597.02	-1.972	4789.02	4789.03	Q63633	S12A5_RAT Solute carrier family 12 member 5 OS=Rattus norvegicus OX=10116 GN=Slc12a5 PE=1 SV=2	361	92.7739	35362		1.67714e-16	1.38077e-15
R.NN[+2715.96255]VTEIQGIPGAASGLIK.E	N2(NGlycan / 2715.9625)	HexNAc(5)Hex(6)Fuc(1)NeuAc(2)	1	1.60509e-06	1.35481e-05	5.7945	470.372	220.921	220.921	3	1499.98	1499.98	-1.48484	4497.93	4497.94	Q63633	S12A5_RAT Solute carrier family 12 member 5 OS=Rattus norvegicus OX=10116 GN=Slc12a5 PE=1 SV=2	361	87.9567	32791		4.29178e-08	3.73408e-07
R.NN[+2350.83035]VTEIQGIPGAASGLIK.E	N2(NGlycan / 2350.8304)	HexNAc(4)Hex(5)Fuc(1)NeuAc(2)	5	9.77387e-16	8.24995e-15	15.0099	817.169	573.292	573.292	3	1378.27	1378.27	-0.258785	4132.8	4132.81	Q63633	S12A5_RAT Solute carrier family 12 member 5 OS=Rattus norvegicus OX=10116 GN=Slc12a5 PE=1 SV=2	361	88.6304	33145		5.77505e-17	4.72858e-16
R.NN[+2303.84086]VTEIQGIPGAASGLIK.E	N2(NGlycan / 2303.8409)	HexNAc(6)Hex(4)Fuc(1)NeuAc(1)	1	8.20607e-10	6.9266e-09	9.08586	624.262	355.589	355.589	3	1362.28	1362.61	1.75272	4084.82	4085.82	Q63633	S12A5_RAT Solute carrier family 12 member 5 OS=Rattus norvegicus OX=10116 GN=Slc12a5 PE=1 SV=2	361	83.3609	30333		1.42009e-11	1.21086e-10
K.N[+1216.42286]ASNMEYR.I	N1(NGlycan / 1216.4229)	HexNAc(2)Hex(5)	2	5.09802e-06	4.303e-05	5.2926	413.329	262.819	262.819	2	1100.93	1100.93	1.19147	2200.85	2200.84	P97546	NPTN_RAT Neuroplastin OS=Rattus norvegicus OX=10116 GN=Nptn PE=1 SV=2	196	22.3837	5616		1.64904e-07	1.25631e-06
K.AN[+1955.72397]ATIEVK.A	N2(NGlycan / 1955.724)	HexNAc(5)Hex(4)Fuc(2)	1	1.19757e-05	0.000101077	4.9217	404.444	219.765	219.765	3	934.405	934.404	0.823331	2801.2	2801.2	P97546	NPTN_RAT Neuroplastin OS=Rattus norvegicus OX=10116 GN=Nptn PE=1 SV=2	227	23.1081	5816		3.98144e-07	2.97666e-06
K.AN[+1914.69743]ATIEVK.A	N2(NGlycan / 1914.6974)	HexNAc(4)Hex(5)Fuc(2)	2	1.23986e-06	1.04653e-05	5.90663	464.271	300.03	300.03	3	920.73	920.728	1.47641	2760.17	2760.17	P97546	NPTN_RAT Neuroplastin OS=Rattus norvegicus OX=10116 GN=Nptn PE=1 SV=2	227	21.2238	5300		3.1834e-08	2.82269e-07
K.AN[+1809.66607]ATIEVK.A	N2(NGlycan / 1809.6661)	HexNAc(5)Hex(4)Fuc(1)	4	1.36087e-08	1.14868e-07	7.86618	583.585	352.893	352.893	2	1328.07	1328.07	0.937507	2655.14	2655.14	P97546	NPTN_RAT Neuroplastin OS=Rattus norvegicus OX=10116 GN=Nptn PE=1 SV=2	227	22.3436	5605		3.06771e-10	2.68936e-09
K.AN[+1702.58133]ATIEVK.A	N2(NGlycan / 1702.5813)	HexNAc(2)Hex(8)	1	1.03994e-08	8.77793e-08	7.98299	564.174	383.879	383.879	2	1274.53	1274.53	1.27059	2548.06	2548.05	P97546	NPTN_RAT Neuroplastin OS=Rattus norvegicus OX=10116 GN=Nptn PE=1 SV=2	227	21.1923	5292		2.1678e-10	1.9785e-09
K.AN[+1606.58669]ATIEVK.A	N2(NGlycan / 1606.5867)	HexNAc(4)Hex(4)Fuc(1)	2	7.55789e-07	6.37945e-06	6.1216	531.474	317.462	317.462	2	1226.53	1226.53	1.02612	2452.06	2452.06	P97546	NPTN_RAT Neuroplastin OS=Rattus norvegicus OX=10116 GN=Nptn PE=1 SV=2	227	22.5297	5656		1.74727e-08	1.50584e-07
K.AN[+1540.52851]ATIEVK.A	N2(NGlycan / 1540.5285)	HexNAc(2)Hex(7)	3	2.39823e-07	2.0243e-06	6.62011	565.636	350.165	350.165	2	1193.51	1193.5	1.39424	2386	2386	P97546	NPTN_RAT Neuroplastin OS=Rattus norvegicus OX=10116 GN=Nptn PE=1 SV=2	227	21.4599	5365		4.90887e-09	4.09241e-08
K.AN[+1501.55533]ATIEVK.A	N2(NGlycan / 1501.5553)	HexNAc(5)Hex(3)	4	9.07397e-10	7.65917e-09	9.0422	619.055	360.615	360.615	2	1174.02	1174.02	1.22283	2347.03	2347.03	P97546	NPTN_RAT Neuroplastin OS=Rattus norvegicus OX=10116 GN=Nptn PE=1 SV=2	227	23.8232	6013		1.4897e-11	1.27968e-10
K.AN[+1378.47569]ATIEVK.A	N2(NGlycan / 1378.4757)	HexNAc(2)Hex(6)	3	4.28643e-07	3.61809e-06	6.3679	558.101	351.922	351.922	2	1112.48	1112.48	1.09679	2223.95	2223.95	P97546	NPTN_RAT Neuroplastin OS=Rattus norvegicus OX=10116 GN=Nptn PE=1 SV=2	227	21.9801	5506		9.65744e-09	8.18192e-08
K.AN[+1216.42286]ATIEVK.A	N2(NGlycan / 1216.4229)	HexNAc(2)Hex(5)	1	1.36087e-09	1.14868e-08	8.86618	612.719	356.91	356.91	2	1031.45	1031.45	1.58144	2061.9	2061.9	P97546	NPTN_RAT Neuroplastin OS=Rattus norvegicus OX=10116 GN=Nptn PE=1 SV=2	227	22.5935	5673		2.2754e-11	1.97231e-10
R.FN[+1216.42286]HTQTIQQK.Q	N2(NGlycan / 1216.4229)	HexNAc(2)Hex(5)	1	3.17023e-13	2.67594e-12	12.4989	747.527	437.847	437.847	3	821.025	821.025	0.107308	2461.06	2461.06	P97686	NRCAM_RAT Neuronal cell adhesion molecule OS=Rattus norvegicus OX=10116 GN=Nrcam PE=1 SV=2	222	18.2771	4505		1.68589e-14	1.3822e-13
K.EDGTLPVN[+1955.72397]R.T	N8(NGlycan / 1955.724)	HexNAc(5)Hex(4)Fuc(2)	2	5.46642e-06	4.61395e-05	5.2623	433.03	203.334	203.334	3	986.082	986.081	0.570665	2956.23	2956.23	P97686	NRCAM_RAT Neuronal cell adhesion molecule OS=Rattus norvegicus OX=10116 GN=Nrcam PE=1 SV=2	307	28.9672	7486		1.73376e-07	1.34055e-06
K.EDGTLPVN[+1647.61324]R.T	N8(NGlycan / 1647.6132)	HexNAc(5)Hex(3)Fuc(1)	2	5.70689e-06	4.81691e-05	5.2436	427.577	216.599	216.599	3	883.377	883.378	-0.648141	2648.12	2648.12	P97686	NRCAM_RAT Neuronal cell adhesion molecule OS=Rattus norvegicus OX=10116 GN=Nrcam PE=1 SV=2	307	30.3684	7905		1.89165e-07	1.49744e-06
K.EDGTLPVN[+1444.53387]R.T	N8(NGlycan / 1444.5339)	HexNAc(4)Hex(3)Fuc(1)	1	2.86359e-06	2.41706e-05	5.54309	408.739	285.6	285.6	2	1223.02	1223.02	-0.186281	2445.04	2445.04	P97686	NRCAM_RAT Neuronal cell adhesion molecule OS=Rattus norvegicus OX=10116 GN=Nrcam PE=1 SV=2	307	30.3796	7908		8.92587e-08	7.50917e-07
K.EDGTLPVN[+1216.42286]R.T	N8(NGlycan / 1216.4229)	HexNAc(2)Hex(5)	1	5.58696e-09	4.71586e-08	8.25282	577.692	465.737	465.737	2	1108.97	1108.97	-0.0198867	2216.93	2216.93	P97686	NRCAM_RAT Neuronal cell adhesion molecule OS=Rattus norvegicus OX=10116 GN=Nrcam PE=1 SV=2	307	29.0623	7515		8.57538e-11	7.66107e-10
K.GSALHEDIYVLHDN[+1216.42286]GTLEIPVAQK.D	N14(NGlycan / 1216.4229)	HexNAc(2)Hex(5)	4	2.03689e-21	1.7193e-20	20.691	1105.14	862.118	862.118	4	959.697	959.696	0.221233	3835.76	3835.76	P97686	NRCAM_RAT Neuronal cell adhesion molecule OS=Rattus norvegicus OX=10116 GN=Nrcam PE=1 SV=2	494	78.6831	27926		1.84084e-22	1.6282e-21
R.QKDGDDEWTSVVVAN[+2100.76148]VSK.Y	N15(NGlycan / 2100.7615)	HexNAc(5)Hex(4)Fuc(1)NeuAc(1)	1	3.40998e-07	2.8783e-06	6.46725	502.614	309.957	309.957	3	1359.91	1359.91	-1.4954	4077.71	4077.72	P97686	NRCAM_RAT Neuronal cell adhesion molecule OS=Rattus norvegicus OX=10116 GN=Nrcam PE=1 SV=2	788	69.2534	22994		7.39286e-09	6.21689e-08
R.QKDGDDEWTSVVVAN[+1647.61324]VSK.Y	N15(NGlycan / 1647.6132)	HexNAc(5)Hex(3)Fuc(1)	1	1.9661e-11	1.65955e-10	10.7064	640.881	446.246	446.246	3	1208.86	1208.86	-1.09692	3624.57	3624.57	P97686	NRCAM_RAT Neuronal cell adhesion molecule OS=Rattus norvegicus OX=10116 GN=Nrcam PE=1 SV=2	788	64.5096	20787		6.58938e-13	5.12138e-12
R.VSVVN[+1216.42286]STLAEAHWDPVPPK.S	N5(NGlycan / 1216.4229)	HexNAc(2)Hex(5)	1	2.27861e-07	1.92333e-06	6.64233	448.844	374.765	374.765	3	1088.17	1088.17	0.0171783	3262.49	3262.49	P97686	NRCAM_RAT Neuronal cell adhesion molecule OS=Rattus norvegicus OX=10116 GN=Nrcam PE=1 SV=2	854	76.9703	27028		4.57723e-09	3.76427e-08
K.YQPIN[+2100.76148]STHELGPLVDLK.I	N5(NGlycan / 2100.7615)	HexNAc(5)Hex(4)Fuc(1)NeuAc(1)	1	7.95894e-07	6.71796e-06	6.09914	429.16	306.698	306.698	3	1342.27	1342.26	0.891764	4024.78	4024.78	P97686	NRCAM_RAT Neuronal cell adhesion molecule OS=Rattus norvegicus OX=10116 GN=Nrcam PE=1 SV=2	989	80.546	28861		1.90514e-08	1.66164e-07
K.YQPIN[+1955.72397]STHELGPLVDLK.I	N5(NGlycan / 1955.724)	HexNAc(5)Hex(4)Fuc(2)	1	2.25227e-11	1.9011e-10	10.6474	642.099	446.584	446.584	3	1293.92	1293.92	1.12218	3879.75	3879.74	P97686	NRCAM_RAT Neuronal cell adhesion molecule OS=Rattus norvegicus OX=10116 GN=Nrcam PE=1 SV=2	989	74.1094	25546		7.82305e-13	6.16847e-12
R.ILIWEDGSLEINN[+1647.61324]ITR.N	N13(NGlycan / 1647.6132)	HexNAc(5)Hex(3)Fuc(1)	3	6.51679e-09	5.5007e-08	8.18597	505.668	422.68	422.68	3	1178.54	1178.54	-1.38215	3533.61	3533.62	Q63198	CNTN1_RAT Contactin-1 OS=Rattus norvegicus OX=10116 GN=Cntn1 PE=1 SV=2	461	97.7069	38020		1.22348e-10	1.10526e-09
R.YTC[+57.02146]TAQTIVDN[+1216.42286]SSASADLVVR.G	N11(NGlycan / 1216.4229)	HexNAc(2)Hex(5)	1	1.15637e-18	9.76069e-18	17.9369	971.866	877.052	877.052	3	1163.18	1163.18	-1.00103	3487.51	3487.51	Q63198	CNTN1_RAT Contactin-1 OS=Rattus norvegicus OX=10116 GN=Cntn1 PE=1 SV=2	583	71.2085	23960	C3(Carbamidomethyl / 57.0215)	9.88417e-20	8.28464e-19
R.YIITWDHVVALSN[+1702.58133]ESTVTGYK.I	N13(NGlycan / 1702.5813)	HexNAc(2)Hex(8)	1	8.44801e-09	7.13081e-08	8.07325	552.264	482.665	482.665	3	1366.6	1366.94	0.675341	4097.79	4098.79	Q63198	CNTN1_RAT Contactin-1 OS=Rattus norvegicus OX=10116 GN=Cntn1 PE=1 SV=2	923	91.5433	34696		1.80798e-10	1.62397e-09
R.YIITWDHVVALSN[+1647.61324]ESTVTGYK.I	N13(NGlycan / 1647.6132)	HexNAc(5)Hex(3)Fuc(1)	1	1.43159e-13	1.20838e-12	12.8442	735.307	598.225	598.225	3	1348.61	1348.61	-1.24394	4043.82	4043.83	Q63198	CNTN1_RAT Contactin-1 OS=Rattus norvegicus OX=10116 GN=Cntn1 PE=1 SV=2	923	91.6272	34740		6.44818e-15	5.1376e-14
R.ITN[+1216.42286]VSEEDSGEYFC[+57.02146]LASNK.M	N3(NGlycan / 1216.4229)	HexNAc(2)Hex(5)	1	1.10762e-17	9.34918e-17	16.9556	936.198	877.359	877.359	3	1127.13	1127.13	-0.465977	3379.38	3379.38	P97685	NFASC_RAT Neurofascin OS=Rattus norvegicus OX=10116 GN=Nfasc PE=1 SV=2	303	69.8157	23271	C14(Carbamidomethyl / 57.0215)	8.73306e-19	6.84484e-18
R.YVPFN[+1216.42286]GTK.L	N5(NGlycan / 1216.4229)	HexNAc(2)Hex(5)	1	7.90029e-07	6.66846e-06	6.10236	456.43	351.574	351.574	2	1071.45	1071.45	-0.512079	2141.9	2141.9	P97685	NFASC_RAT Neurofascin OS=Rattus norvegicus OX=10116 GN=Nfasc PE=1 SV=2	862	38.0328	10230		1.87828e-08	1.63514e-07
K.QM[+15.99492]VENFSPN[+1955.72397]QTK.F	M2(Oxidation / 15.9949); N9(NGlycan / 1955.724)	HexNAc(5)Hex(4)Fuc(2)	1	1.50705e-06	1.27206e-05	5.82187	543.41	199.661	9.83565	3	1132.14	1132.13	1.67569	3394.39	3394.39	P97685	NFASC_RAT Neurofascin OS=Rattus norvegicus OX=10116 GN=Nfasc PE=1 SV=2	873	34.3498	9084		3.982e-08	3.42857e-07
K.QM[+15.99492]VENFSPN[+1647.61324]QTK.F	M2(Oxidation / 15.9949); N9(NGlycan / 1647.6132)	HexNAc(5)Hex(3)Fuc(1)	1	1.35251e-07	1.14163e-06	6.86886	578.768	293.965	6.03919	3	1029.43	1029.43	0.0282854	3086.28	3086.28	P97685	NFASC_RAT Neurofascin OS=Rattus norvegicus OX=10116 GN=Nfasc PE=1 SV=2	873	35.4705	9420		2.93594e-09	2.24885e-08
K.QMVEN[+1647.61324]FSPNQTK.F	N5(NGlycan / 1647.6132)	HexNAc(5)Hex(3)Fuc(1)	1	5.67322e-06	4.78849e-05	5.24617	517.711	237.943	3.61163	3	1024.1	1024.1	-0.35549	3070.28	3070.28	P97685	NFASC_RAT Neurofascin OS=Rattus norvegicus OX=10116 GN=Nfasc PE=1 SV=2	873	44.4258	12584		1.85598e-07	1.46201e-06
K.QM[+15.99492]VENFSPN[+1444.53387]QTK.F	M2(Oxidation / 15.9949); N9(NGlycan / 1444.5339)	HexNAc(4)Hex(3)Fuc(1)	1	2.00177e-11	1.68966e-10	10.6986	670.149	370.186	8.12969	3	961.738	961.737	0.420655	2883.2	2883.2	P97685	NFASC_RAT Neurofascin OS=Rattus norvegicus OX=10116 GN=Nfasc PE=1 SV=2	873	35.5008	9429		6.67289e-13	5.20379e-12
K.IHETAPDEQSIWN[+1752.64460]VTVLPNSK.W	N13(NGlycan / 1752.6446)	HexNAc(4)Hex(4)Fuc(2)	1	4.54273e-05	0.000383332	4.34268	400.632	251.363	251.363	3	1377.95	1377.62	-5.35079	4131.82	4130.84	P97685	NFASC_RAT Neurofascin OS=Rattus norvegicus OX=10116 GN=Nfasc PE=1 SV=2	1003	80.6172	28898		1.39782e-06	1.08718e-05
K.IHETAPDEQSIWN[+1647.61324]VTVLPNSK.W	N13(NGlycan / 1647.6132)	HexNAc(5)Hex(3)Fuc(1)	1	7.52165e-06	6.34859e-05	5.12369	417.051	282.204	282.204	3	1342.94	1342.61	-4.97798	4026.8	4025.81	P97685	NFASC_RAT Neurofascin OS=Rattus norvegicus OX=10116 GN=Nfasc PE=1 SV=2	1003	81.5078	29366		2.78839e-07	2.16592e-06
R.NVETNN[+1955.72397]STVLIEGK.K	N6(NGlycan / 1955.724)	HexNAc(5)Hex(4)Fuc(2)	3	1.30179e-15	1.09881e-14	14.8855	837.148	609.169	0.48	3	1158.51	1158.51	0.457674	3473.51	3473.5	P46101	DPP6_RAT Dipeptidyl aminopeptidase-like protein 6 OS=Rattus norvegicus OX=10116 GN=Dpp6 PE=1 SV=1	163	44.0164	12422		9.65741e-17	7.91624e-16
R.NVETNN[+1647.61324]STVLIEGK.K	N6(NGlycan / 1647.6132)	HexNAc(5)Hex(3)Fuc(1)	1	1.30179e-17	1.09881e-16	16.8855	917.923	655.117	5.92095	3	1055.8	1055.8	-0.252909	3165.39	3165.39	P46101	DPP6_RAT Dipeptidyl aminopeptidase-like protein 6 OS=Rattus norvegicus OX=10116 GN=Dpp6 PE=1 SV=1	163	45.0446	12819		1.15529e-18	9.01089e-18
R.NVETN[+1647.61324]NSTVLIEGK.K	N5(NGlycan / 1647.6132)	HexNAc(5)Hex(3)Fuc(1)	1	1.61162e-17	1.36034e-16	16.7927	911.498	662.063	3.37813	2	1583.2	1583.2	-0.345121	3165.39	3165.39	P46101	DPP6_RAT Dipeptidyl aminopeptidase-like protein 6 OS=Rattus norvegicus OX=10116 GN=Dpp6 PE=1 SV=1	163	45.0783	12831		1.66119e-18	1.35971e-17
R.NVETNN[+1444.53387]STVLIEGK.K	N6(NGlycan / 1444.5339)	HexNAc(4)Hex(3)Fuc(1)	3	1.61162e-17	1.36034e-16	16.7927	933.775	669.356	5.27469	2	1481.66	1481.66	0.299625	2962.32	2962.31	P46101	DPP6_RAT Dipeptidyl aminopeptidase-like protein 6 OS=Rattus norvegicus OX=10116 GN=Dpp6 PE=1 SV=1	163	45.1439	12857		1.67577e-18	1.3736e-17
R.LAYATIN[+1501.55533]DSR.V	N7(NGlycan / 1501.5553)	HexNAc(5)Hex(3)	3	7.56318e-09	6.38395e-08	8.1213	586.254	323.729	323.729	3	875.713	875.715	-1.47256	2625.13	2625.13	P46101	DPP6_RAT Dipeptidyl aminopeptidase-like protein 6 OS=Rattus norvegicus OX=10116 GN=Dpp6 PE=1 SV=1	307	42.6273	11875		1.51266e-10	1.3903e-09
R.LAYATIN[+1216.42286]DSR.V	N7(NGlycan / 1216.4229)	HexNAc(2)Hex(5)	2	3.30978e-11	2.79372e-10	10.4802	637.041	451.45	451.45	2	1170.5	1170.5	-0.566418	2340	2340	P46101	DPP6_RAT Dipeptidyl aminopeptidase-like protein 6 OS=Rattus norvegicus OX=10116 GN=Dpp6 PE=1 SV=1	307	42.1093	11680		1.21478e-12	9.55226e-12
K.C[+57.02146]EGPGVPTVTVHN[+1768.63952]TTDK.R	N13(NGlycan / 1768.6395)	HexNAc(4)Hex(5)Fuc(1)	1	3.14777e-07	2.65697e-06	6.502	467.519	311.492	311.492	3	1194.17	1194.17	0.601783	3580.5	3580.5	P46101	DPP6_RAT Dipeptidyl aminopeptidase-like protein 6 OS=Rattus norvegicus OX=10116 GN=Dpp6 PE=1 SV=1	548	40.3584	11034	C1(Carbamidomethyl / 57.0215)	6.48051e-09	5.54244e-08
K.C[+57.02146]EGPGVPTVTVHN[+1501.55533]TTDKR.R	N13(NGlycan / 1501.5553)	HexNAc(5)Hex(3)	1	1.45878e-06	1.23132e-05	5.83601	415.542	311.655	311.655	4	868.135	868.134	0.787358	3469.52	3469.52	P46101	DPP6_RAT Dipeptidyl aminopeptidase-like protein 6 OS=Rattus norvegicus OX=10116 GN=Dpp6 PE=1 SV=1	548	37.0142	9887	C1(Carbamidomethyl / 57.0215)	3.83404e-08	3.33141e-07
K.C[+57.02146]EGPGVPTVTVHN[+1565.56014]TTDK.R	N13(NGlycan / 1565.5601)	HexNAc(3)Hex(5)Fuc(1)	3	1.61444e-07	1.36272e-06	6.79198	534.392	335.021	335.021	3	1126.48	1126.48	-0.35526	3377.42	3377.42	P46101	DPP6_RAT Dipeptidyl aminopeptidase-like protein 6 OS=Rattus norvegicus OX=10116 GN=Dpp6 PE=1 SV=1	548	40.2463	10994	C1(Carbamidomethyl / 57.0215)	3.53349e-09	2.78869e-08
K.C[+57.02146]EGPGVPTVTVHN[+1501.55533]TTDK.R	N13(NGlycan / 1501.5553)	HexNAc(5)Hex(3)	5	3.81143e-09	3.21716e-08	8.41891	552.352	433.423	433.423	3	1105.14	1105.14	-0.0523268	3313.41	3313.41	P46101	DPP6_RAT Dipeptidyl aminopeptidase-like protein 6 OS=Rattus norvegicus OX=10116 GN=Dpp6 PE=1 SV=1	548	40.5622	11105	C1(Carbamidomethyl / 57.0215)	5.12934e-11	4.25504e-10
K.C[+57.02146]EGPGVPTVTVHN[+1216.42286]TTDK.R	N13(NGlycan / 1216.4229)	HexNAc(2)Hex(5)	1	1.22266e-06	1.03201e-05	5.9127	510.462	339.832	339.832	3	1010.1	1010.1	0.636117	3028.28	3028.28	P46101	DPP6_RAT Dipeptidyl aminopeptidase-like protein 6 OS=Rattus norvegicus OX=10116 GN=Dpp6 PE=1 SV=1	548	40.7724	11177	C1(Carbamidomethyl / 57.0215)	3.0193e-08	2.66099e-07
K.GN[+1913.67702]ETIVNLIHSTR.I	N2(NGlycan / 1913.677)	HexNAc(4)Hex(5)NeuAc(1)	1	7.40973e-09	6.25442e-08	8.1302	598.236	350.197	350.197	3	1123.15	1123.16	-1.61886	3367.45	3367.45	Q00493	CBPE_MOUSE Carboxypeptidase E OS=Mus musculus OX=10090 GN=Cpe PE=1 SV=2	138	69.3072	23021		1.48428e-10	1.36234e-09
K.GN[+1378.47569]ETIVNLIHSTR.I	N2(NGlycan / 1378.4757)	HexNAc(2)Hex(6)	1	1.61162e-15	1.36034e-14	14.7927	818.565	603.76	603.76	3	944.755	944.755	0.00886315	2832.25	2832.25	Q00493	CBPE_MOUSE Carboxypeptidase E OS=Mus musculus OX=10090 GN=Cpe PE=1 SV=2	138	63.8918	20500		1.35787e-16	1.09436e-15
K.GN[+1216.42286]ETIVNLIHSTR.I	N2(NGlycan / 1216.4229)	HexNAc(2)Hex(5)	3	1.61162e-13	1.36034e-12	12.7927	719.238	482.647	482.647	3	890.737	890.738	-0.437237	2670.2	2670.2	Q00493	CBPE_MOUSE Carboxypeptidase E OS=Mus musculus OX=10090 GN=Cpe PE=1 SV=2	138	64.3034	20690		7.98171e-15	6.47544e-14
R.DLQGNPIAN[+2465.89368]ATISVDGIDHDVTSAK.D	N9(NGlycan / 2465.8937)	HexNAc(6)Hex(5)Fuc(1)NeuAc(1)	3	1.07176e-18	9.04657e-18	17.9699	1011.36	865.444	865.444	4	1255.29	1255.04	-7.42103	5018.12	5017.16	Q00493	CBPE_MOUSE Carboxypeptidase E OS=Mus musculus OX=10090 GN=Cpe PE=1 SV=2	382	84.7856	31098		8.92034e-20	7.64058e-19
R.DLQGNPIAN[+1378.47569]ATISVDGIDHDVTSAK.D	N9(NGlycan / 1378.4757)	HexNAc(2)Hex(6)	1	2.12655e-21	1.79498e-20	20.6723	1112	976.312	976.312	3	1310.58	1310.58	-0.665447	3929.74	3929.74	Q00493	CBPE_MOUSE Carboxypeptidase E OS=Mus musculus OX=10090 GN=Cpe PE=1 SV=2	382	84.733	31069		2.39092e-22	2.13251e-21
R.DLQGNPIAN[+1216.42286]ATISVDGIDHDVTSAK.D	N9(NGlycan / 1216.4229)	HexNAc(2)Hex(5)	7	3.0625e-22	2.585e-21	21.5139	1174.54	1046.93	1046.93	4	942.678	942.677	1.25382	3767.69	3767.69	Q00493	CBPE_MOUSE Carboxypeptidase E OS=Mus musculus OX=10090 GN=Cpe PE=1 SV=2	382	85.1783	31307		3.55417e-23	3.04438e-22
R.DLQGNPIAN[+1054.37004]ATISVDGIDHDVTSAK.D	N9(NGlycan / 1054.37)	HexNAc(2)Hex(4)	1	2.03689e-13	1.7193e-12	12.691	701.406	544.585	544.585	3	1202.55	1202.55	-0.371128	3605.63	3605.63	Q00493	CBPE_MOUSE Carboxypeptidase E OS=Mus musculus OX=10090 GN=Cpe PE=1 SV=2	382	85.7535	31600		1.2072e-14	9.50745e-14
K.ADPVLLNN[+1200.42795]HSNLKPAPTVPAAPSSPDTTSEPKGPGDGAEEDESNTGGR.G	N8(NGlycan / 1200.4279)	HexNAc(2)Hex(4)Fuc(1)	2	5.13556e-07	4.33482e-06	6.28941	433.441	432.539	432.539	5	1199.55	1199.75	6.9789	5993.74	5994.7	Q5FVI4	CEND_RAT Cell cycle exit and neuronal differentiation protein 1 OS=Rattus norvegicus OX=10116 GN=Cend1 PE=1 SV=1	67	66.8141	21833		1.14535e-08	9.9561e-08
K.NQKDEVN[+2610.93119]ETDLK.Q	N7(NGlycan / 2610.9312)	HexNAc(6)Hex(5)NeuAc(2)	1	3.57017e-05	0.000301282	4.44731	495.826	130.604	130.604	3	1348.89	1348.55	3.81514	4044.64	4043.62	Q794F9	4F2_RAT 4F2 cell-surface antigen heavy chain OS=Rattus norvegicus OX=10116 GN=Slc3a2 PE=1 SV=1	160	29.0437	7509		1.09395e-06	8.84128e-06
K.NQKDEVN[+2303.84086]ETDLK.Q	N7(NGlycan / 2303.8409)	HexNAc(6)Hex(4)Fuc(1)NeuAc(1)	3	1.7362e-07	1.46549e-06	6.7604	597.049	150.358	150.358	3	1246.18	1246.18	0.812027	3736.54	3736.53	Q794F9	4F2_RAT 4F2 cell-surface antigen heavy chain OS=Rattus norvegicus OX=10116 GN=Slc3a2 PE=1 SV=1	160	29.9669	7787		3.8263e-09	3.02051e-08
K.NQKDEVN[+2188.77753]ETDLK.Q	N7(NGlycan / 2188.7775)	HexNAc(4)Hex(4)Fuc(1)NeuAc(2)	1	4.95331e-09	4.181e-08	8.3051	607.363	184.908	184.908	3	1207.83	1207.83	0.594719	3621.47	3621.47	Q794F9	4F2_RAT 4F2 cell-surface antigen heavy chain OS=Rattus norvegicus OX=10116 GN=Slc3a2 PE=1 SV=1	160	32.4127	8507		6.94808e-11	6.05365e-10
K.NQKDEVN[+1955.72397]ETDLK.Q	N7(NGlycan / 1955.724)	HexNAc(5)Hex(4)Fuc(2)	1	2.41326e-06	2.03696e-05	5.6174	558.37	205.758	205.758	3	1130.14	1130.14	0.779565	3388.42	3388.42	Q794F9	4F2_RAT 4F2 cell-surface antigen heavy chain OS=Rattus norvegicus OX=10116 GN=Slc3a2 PE=1 SV=1	160	24.0657	6080		7.1204e-08	5.98097e-07
K.NQKDEVN[+1752.64460]ETDLK.Q	N7(NGlycan / 1752.6446)	HexNAc(4)Hex(4)Fuc(2)	1	5.84284e-09	4.93184e-08	8.23338	648.065	243.152	243.152	3	1062.45	1062.45	2.33229	3185.34	3185.34	Q794F9	4F2_RAT 4F2 cell-surface antigen heavy chain OS=Rattus norvegicus OX=10116 GN=Slc3a2 PE=1 SV=1	160	24.0261	6069		1.01017e-10	9.16732e-10
K.NQKDEVN[+1647.61324]ETDLK.Q	N7(NGlycan / 1647.6132)	HexNAc(5)Hex(3)Fuc(1)	2	6.81197e-10	5.74986e-09	9.16673	606.626	303.01	303.01	3	1027.44	1027.44	0.465987	3080.31	3080.3	Q794F9	4F2_RAT 4F2 cell-surface antigen heavy chain OS=Rattus norvegicus OX=10116 GN=Slc3a2 PE=1 SV=1	160	25.0978	6364		1.15528e-11	9.48864e-11
K.NQKDEVN[+1444.53387]ETDLK.Q	N7(NGlycan / 1444.5339)	HexNAc(4)Hex(3)Fuc(1)	1	6.81197e-11	5.74986e-10	10.1667	687.392	312.954	312.954	3	959.747	959.747	0.635506	2877.23	2877.23	Q794F9	4F2_RAT 4F2 cell-surface antigen heavy chain OS=Rattus norvegicus OX=10116 GN=Slc3a2 PE=1 SV=1	160	25.0439	6349		1.92685e-12	1.49745e-11
K.N[+1216.42286]FSEDR.L	N1(NGlycan / 1216.4229)	HexNAc(2)Hex(5)	1	2.0492e-07	1.72969e-06	6.68842	455.141	390.422	390.422	2	992.381	992.381	0.336805	1983.76	1983.75	Q794F9	4F2_RAT 4F2 cell-surface antigen heavy chain OS=Rattus norvegicus OX=10116 GN=Slc3a2 PE=1 SV=1	263	18.4963	4554		4.49751e-09	3.68537e-08
K.AMDN[+1856.65556]VTVR.Q	N4(NGlycan / 1856.6556)	HexNAc(3)Hex(5)Fuc(1)NeuAc(1)	2	4.02462e-06	3.39702e-05	5.39527	465.046	210.261	210.261	3	921.374	921.374	0.475628	2762.11	2762.11	P32736	OPCM_RAT Opioid-binding protein/cell adhesion molecule OS=Rattus norvegicus OX=10116 GN=Opcml PE=1 SV=2	41	32.9924	8678		1.24629e-07	9.67792e-07
K.DYGN[+2188.77753]YTC[+57.02146]VATNK.L	N4(NGlycan / 2188.7775)	HexNAc(4)Hex(4)Fuc(1)NeuAc(2)	1	6.67504e-07	5.63426e-06	6.17555	499.534	273.701	273.701	3	1198.8	1198.8	0.628811	3594.39	3594.38	P32736	OPCM_RAT Opioid-binding protein/cell adhesion molecule OS=Rattus norvegicus OX=10116 GN=Opcml PE=1 SV=2	290	50.0415	14667	C7(Carbamidomethyl / 57.0215)	1.55488e-08	1.36368e-07
K.DYGN[+1955.72397]YTC[+57.02146]VATNK.L	N4(NGlycan / 1955.724)	HexNAc(5)Hex(4)Fuc(2)	1	1.30179e-10	1.09881e-09	9.88546	586.416	412.87	412.87	3	1121.11	1121.11	-0.271973	3361.33	3361.33	P32736	OPCM_RAT Opioid-binding protein/cell adhesion molecule OS=Rattus norvegicus OX=10116 GN=Opcml PE=1 SV=2	290	42.4633	11810	C7(Carbamidomethyl / 57.0215)	2.87812e-12	2.22661e-11
K.DYGN[+1647.61324]YTC[+57.02146]VATNK.L	N4(NGlycan / 1647.6132)	HexNAc(5)Hex(3)Fuc(1)	3	1.30179e-13	1.09881e-12	12.8855	709.398	503.509	503.509	3	1018.41	1018.41	0.265094	3053.22	3053.22	P32736	OPCM_RAT Opioid-binding protein/cell adhesion molecule OS=Rattus norvegicus OX=10116 GN=Opcml PE=1 SV=2	290	43.4299	12200	C7(Carbamidomethyl / 57.0215)	5.4755e-15	4.39219e-14
R.VIYQNHN[+1501.55533]K.T	N7(NGlycan / 1501.5553)	HexNAc(5)Hex(3)	2	3.73865e-05	0.000315497	4.42729	426.398	130.808	130.808	3	839.701	839.701	0.991487	2517.09	2517.09	Q05695	L1CAM_RAT Neural cell adhesion molecule L1 OS=Rattus norvegicus OX=10116 GN=L1cam PE=1 SV=3	287	14.6682	3513		1.1475e-06	9.37527e-06
K.EQLFFN[+1752.64460]LSDPELR.T	N6(NGlycan / 1752.6446)	HexNAc(4)Hex(4)Fuc(2)	1	4.18199e-05	0.000352899	4.37862	403.565	234.039	234.039	3	1120.82	1120.82	0.51245	3360.45	3360.45	Q05695	L1CAM_RAT Neural cell adhesion molecule L1 OS=Rattus norvegicus OX=10116 GN=L1cam PE=1 SV=3	963	94.192	36111		1.20595e-06	9.84313e-06
K.EQLFFN[+1647.61324]LSDPELR.T	N6(NGlycan / 1647.6132)	HexNAc(5)Hex(3)Fuc(1)	1	1.35908e-15	1.14718e-14	14.8668	820.702	572.311	572.311	3	1085.81	1085.81	-0.974699	3255.42	3255.42	Q05695	L1CAM_RAT Neural cell adhesion molecule L1 OS=Rattus norvegicus OX=10116 GN=L1cam PE=1 SV=3	963	94.8463	36460		1.0091e-16	8.16669e-16
K.EQLFFN[+1444.53387]LSDPELR.T	N6(NGlycan / 1444.5339)	HexNAc(4)Hex(3)Fuc(1)	1	9.82187e-07	8.29041e-06	6.00781	455.392	262.542	262.542	2	1526.67	1526.67	0.0734082	3052.34	3052.34	Q05695	L1CAM_RAT Neural cell adhesion molecule L1 OS=Rattus norvegicus OX=10116 GN=L1cam PE=1 SV=3	963	95.256	36660		2.31876e-08	2.04321e-07
R.THN[+1647.61324]LTNLNPDLQYR.F	N3(NGlycan / 1647.6132)	HexNAc(5)Hex(3)Fuc(1)	1	1.68256e-13	1.42022e-12	12.774	724.627	419.495	419.495	3	1116.16	1116.16	-0.799738	3346.47	3346.47	Q05695	L1CAM_RAT Neural cell adhesion molecule L1 OS=Rattus norvegicus OX=10116 GN=L1cam PE=1 SV=3	976	56.3198	17130		9.30104e-15	7.52143e-14
K.VSPDHQPQPQYVSYN[+1216.42286]QSSYTQWDLQPDTK.Y	N15(NGlycan / 1216.4229)	HexNAc(2)Hex(5)	4	3.15479e-15	2.6629e-14	14.501	843.239	748.913	748.913	3	1551.67	1551.67	2.07794	4653	4652.99	Q05695	L1CAM_RAT Neural cell adhesion molecule L1 OS=Rattus norvegicus OX=10116 GN=L1cam PE=1 SV=3	1058	75.2561	26141		2.35624e-16	1.97332e-15
R.VDVIVAN[+1955.72397]LTVTDKDQPHTPAWNAAYR.I	N7(NGlycan / 1955.724)	HexNAc(5)Hex(4)Fuc(2)	4	6.20042e-15	5.23366e-14	14.2076	830.636	517.043	517.043	4	1213.06	1213.31	-0.117138	4849.2	4850.2	Q9Z1Y3	CADH2_RAT Cadherin-2 OS=Rattus norvegicus OX=10116 GN=Cdh2 PE=1 SV=1	396	78.2999	27732		3.33023e-16	2.75754e-15
R.VDVIVAN[+1647.61324]LTVTDKDQPHTPAWNAAYR.I	N7(NGlycan / 1647.6132)	HexNAc(5)Hex(3)Fuc(1)	2	3.17013e-21	2.67585e-20	20.4989	1119.56	755.041	755.041	4	1136.28	1136.28	-0.349886	4542.09	4542.09	Q9Z1Y3	CADH2_RAT Cadherin-2 OS=Rattus norvegicus OX=10116 GN=Cdh2 PE=1 SV=1	396	78.8868	28029		3.50941e-22	2.96464e-21
K.LVQVGIYN[+1540.52851]GTHVIPNDR.K	N8(NGlycan / 1540.5285)	HexNAc(2)Hex(7)	1	4.2513e-09	3.58844e-08	8.37148	572.44	492.743	492.743	3	1145.85	1145.85	-1.8605	3435.54	3435.54	P35439-2	NMDZ1_RAT Isoform B of Glutamate receptor ionotropic, NMDA 1 OS=Rattus norvegicus OX=10116 GN=Grin1	382	63.6459	20392		6.06327e-11	5.17895e-10
K.LVQVGIYN[+1378.47569]GTHVIPNDR.K	N8(NGlycan / 1378.4757)	HexNAc(2)Hex(6)	1	1.26327e-17	1.0663e-16	16.8985	934.943	903.325	903.325	3	1091.83	1091.83	-0.582913	3273.49	3273.49	P35439-2	NMDZ1_RAT Isoform B of Glutamate receptor ionotropic, NMDA 1 OS=Rattus norvegicus OX=10116 GN=Grin1	382	63.8472	20482		1.08168e-18	8.30502e-18
K.LVQVGIYN[+1216.42286]GTHVIPNDR.K	N8(NGlycan / 1216.4229)	HexNAc(2)Hex(5)	1	1.21001e-18	1.02135e-17	17.9172	959.977	920.252	920.252	3	1037.82	1037.82	-0.349232	3111.44	3111.44	P35439-2	NMDZ1_RAT Isoform B of Glutamate receptor ionotropic, NMDA 1 OS=Rattus norvegicus OX=10116 GN=Grin1	382	64.1868	20638		1.13272e-19	9.38049e-19
K.VIC[+57.02146]TGPN[+1216.42286]DTSPGSPR.H	N7(NGlycan / 1216.4229)	HexNAc(2)Hex(5)	3	1.30179e-20	1.09881e-19	19.8855	1079.98	834.057	834.057	3	925.39	925.39	0.0570884	2774.16	2774.16	P35439-2	NMDZ1_RAT Isoform B of Glutamate receptor ionotropic, NMDA 1 OS=Rattus norvegicus OX=10116 GN=Grin1	455	30.4808	7937	C3(Carbamidomethyl / 57.0215)	1.34118e-21	1.1471e-20
R.TM[+15.99492]N[+1216.42286]FTYEVHLVADGK.F	M2(Oxidation / 15.9949); N3(NGlycan / 1216.4229)	HexNAc(2)Hex(5)	1	1.68256e-16	1.42022e-15	15.774	857.726	653.224	653.224	3	986.42	986.421	-1.36856	2957.24	2957.25	P35439-2	NMDZ1_RAT Isoform B of Glutamate receptor ionotropic, NMDA 1 OS=Rattus norvegicus OX=10116 GN=Grin1	490	71.3357	24021		1.59344e-17	1.25687e-16
R.ITN[+1216.42286]VSDATK.R	N3(NGlycan / 1216.4229)	HexNAc(2)Hex(5)	1	1.66937e-09	1.40908e-08	8.77745	640.403	335.981	335.981	2	1082.97	1082.96	1.23697	2164.93	2164.92	P97710	SHPS1_RAT Tyrosine-protein phosphatase non-receptor type substrate 1 OS=Rattus norvegicus OX=10116 GN=Sirpa PE=1 SV=1	91	19.9825	4961		2.92057e-11	2.49133e-10
R.EDVVFTC[+57.02146]QVEHDSQPAITEN[+2204.77244]HTVR.A	N20(NGlycan / 2204.7724)	HexNAc(4)Hex(5)NeuAc(2)	2	1.24043e-05	0.000104694	4.90643	476.084	189.195	189.195	4	1255.03	1254.77	2.59591	5017.09	5016.07	P97710	SHPS1_RAT Tyrosine-protein phosphatase non-receptor type substrate 1 OS=Rattus norvegicus OX=10116 GN=Sirpa PE=1 SV=1	326	62.5813	19909	C7(Carbamidomethyl / 57.0215)	4.1672e-07	3.1248e-06
R.EDVVFTC[+57.02146]QVEHDSQPAITEN[+2188.77753]HTVR.A	N20(NGlycan / 2188.7775)	HexNAc(4)Hex(4)Fuc(1)NeuAc(2)	1	1.5368e-08	1.29719e-07	7.81338	594.561	243.082	243.082	4	1250.77	1250.77	-1.15977	5000.07	5000.08	P97710	SHPS1_RAT Tyrosine-protein phosphatase non-receptor type substrate 1 OS=Rattus norvegicus OX=10116 GN=Sirpa PE=1 SV=1	326	66.3004	21601	C7(Carbamidomethyl / 57.0215)	3.66012e-10	3.1651e-09
R.EDVVFTC[+57.02146]QVEHDSQPAITEN[+1897.68211]HTVR.A	N20(NGlycan / 1897.6821)	HexNAc(4)Hex(4)Fuc(1)NeuAc(1)	2	0.000108253	0.00091311	3.96556	440.297	89.4711	89.4711	4	1178	1178	-1.36232	4708.98	4708.98	P97710	SHPS1_RAT Tyrosine-protein phosphatase non-receptor type substrate 1 OS=Rattus norvegicus OX=10116 GN=Sirpa PE=1 SV=1	326	63.0296	20121	C7(Carbamidomethyl / 57.0215)	3.07491e-06	2.23896e-05
R.EDVVFTC[+57.02146]QVEHDSQPAITEN[+1752.64460]HTVR.A	N20(NGlycan / 1752.6446)	HexNAc(4)Hex(4)Fuc(2)	2	5.76231e-10	4.86387e-09	9.2394	641.055	330.327	49.2642	4	1141.74	1141.74	0.393469	4563.95	4563.94	P97710	SHPS1_RAT Tyrosine-protein phosphatase non-receptor type substrate 1 OS=Rattus norvegicus OX=10116 GN=Sirpa PE=1 SV=1	326	59.3826	18453	C7(Carbamidomethyl / 57.0215)	1.00724e-11	8.02231e-11
R.EDVVFTC[+57.02146]QVEHDSQPAITEN[+1647.61324]HTVR.A	N20(NGlycan / 1647.6132)	HexNAc(5)Hex(3)Fuc(1)	5	2.12655e-14	1.79498e-13	13.6723	752.63	451.137	451.137	4	1115.48	1115.48	-0.886727	4458.91	4458.91	P97710	SHPS1_RAT Tyrosine-protein phosphatase non-receptor type substrate 1 OS=Rattus norvegicus OX=10116 GN=Sirpa PE=1 SV=1	326	59.7384	18634	C7(Carbamidomethyl / 57.0215)	1.413e-15	1.13126e-14
R.EDVVFTC[+57.02146]QVEHDSQPAITEN[+1444.53387]HTVR.A	N20(NGlycan / 1444.5339)	HexNAc(4)Hex(3)Fuc(1)	3	8.8686e-06	7.4854e-05	5.05214	502.942	209.5	209.5	4	1064.71	1064.71	-0.406423	4255.83	4255.83	P97710	SHPS1_RAT Tyrosine-protein phosphatase non-receptor type substrate 1 OS=Rattus norvegicus OX=10116 GN=Sirpa PE=1 SV=1	326	59.8544	18685	C7(Carbamidomethyl / 57.0215)	3.13885e-07	2.41395e-06
K.SVEFTSC[+57.02146]N[+1702.58133]DTVVIPC[+57.02146]K.V	N8(NGlycan / 1702.5813)	HexNAc(2)Hex(8)	2	1.81927e-12	1.53562e-11	11.7401	651.263	609.677	609.677	3	1186.82	1186.82	0.721493	3558.44	3558.44	P97829	CD47_RAT Leukocyte surface antigen CD47 OS=Rattus norvegicus OX=10116 GN=Cd47 PE=1 SV=1	27	64.9946	21008	C7(Carbamidomethyl / 57.0215); C15(Carbamidomethyl / 57.0215)	9.22089e-14	7.58727e-13
R.EQN[+2100.76148]FTSAK.I	N3(NGlycan / 2100.7615)	HexNAc(5)Hex(4)Fuc(1)NeuAc(1)	2	4.54286e-06	3.83444e-05	5.34267	441.309	236.452	236.452	3	1009.07	1009.07	0.604348	3025.21	3025.2	P97829	CD47_RAT Leukocyte surface antigen CD47 OS=Rattus norvegicus OX=10116 GN=Cd47 PE=1 SV=1	78	24.6586	6242		1.46373e-07	1.10219e-06
R.EQN[+1216.42286]FTSAK.I	N3(NGlycan / 1216.4229)	HexNAc(2)Hex(5)	1	2.08497e-06	1.75986e-05	5.6809	426.514	303.806	303.806	2	1070.94	1070.94	1.42888	2140.87	2140.86	P97829	CD47_RAT Leukocyte surface antigen CD47 OS=Rattus norvegicus OX=10116 GN=Cd47 PE=1 SV=1	78	19.0846	4713		5.63238e-08	4.87539e-07
K.GIASLTM[+15.99492]DTHEAVVGN[+1540.52851]YTC[+57.02146]EVTELSR.E	M7(Oxidation / 15.9949); N16(NGlycan / 1540.5285)	HexNAc(2)Hex(7)	2	1.4349e-06	1.21116e-05	5.84318	425.125	310.96	310.96	3	1470.96	1470.63	-2.53621	4410.85	4409.86	P97829	CD47_RAT Leukocyte surface antigen CD47 OS=Rattus norvegicus OX=10116 GN=Cd47 PE=1 SV=1	94	86.9575	32270	C19(Carbamidomethyl / 57.0215)	3.5947e-08	3.09533e-07
K.GIASLTMDTHEAVVGN[+1540.52851]YTC[+57.02146]EVTELSR.E	N16(NGlycan / 1540.5285)	HexNAc(2)Hex(7)	3	4.06083e-13	3.42767e-12	12.3914	716.537	564.675	564.675	3	1465.29	1465.29	-1.74455	4393.86	4393.87	P97829	CD47_RAT Leukocyte surface antigen CD47 OS=Rattus norvegicus OX=10116 GN=Cd47 PE=1 SV=1	94	91.387	34609	C19(Carbamidomethyl / 57.0215)	2.18093e-14	1.80072e-13
K.GIASLTMDTHEAVVGN[+1378.47569]YTC[+57.02146]EVTELSR.E	N16(NGlycan / 1378.4757)	HexNAc(2)Hex(6)	1	7.94253e-10	6.70414e-09	9.10004	597.198	387.51	387.51	3	1410.94	1411.28	-1.97825	4230.8	4231.81	P97829	CD47_RAT Leukocyte surface antigen CD47 OS=Rattus norvegicus OX=10116 GN=Cd47 PE=1 SV=1	94	91.631	34742	C19(Carbamidomethyl / 57.0215)	1.38798e-11	1.17911e-10
K.GIASLTM[+15.99492]DTHEAVVGN[+1216.42286]YTC[+57.02146]EVTELSR.E	M7(Oxidation / 15.9949); N16(NGlycan / 1216.4229)	HexNAc(2)Hex(5)	1	2.99819e-06	2.53067e-05	5.52314	503.37	318.827	318.827	3	1362.25	1362.59	-0.842338	4084.75	4085.76	P97829	CD47_RAT Leukocyte surface antigen CD47 OS=Rattus norvegicus OX=10116 GN=Cd47 PE=1 SV=1	94	87.3441	32481	C19(Carbamidomethyl / 57.0215)	9.30411e-08	7.79155e-07
K.GIASLTMDTHEAVVGN[+1216.42286]YTC[+57.02146]EVTELSR.E	N16(NGlycan / 1216.4229)	HexNAc(2)Hex(5)	3	2.12655e-16	1.79498e-15	15.6723	898.146	692.796	332.087	3	1357.26	1357.26	-1.38976	4069.76	4069.76	P97829	CD47_RAT Leukocyte surface antigen CD47 OS=Rattus norvegicus OX=10116 GN=Cd47 PE=1 SV=1	94	91.7332	34795	C19(Carbamidomethyl / 57.0215)	1.9028e-17	1.55562e-16
K.VQN[+1955.72397]M[+15.99492]SQSIEVLDR.R	N3(NGlycan / 1955.724); M4(Oxidation / 15.9949)	HexNAc(5)Hex(4)Fuc(2)	1	3.00215e-10	2.53406e-09	9.52257	618.51	357.035	357.035	3	1164.16	1164.16	-0.172018	3490.48	3490.48	Q62609	NOE1_RAT Noelin OS=Rattus norvegicus OX=10116 GN=Olfm1 PE=1 SV=1	101	48.0607	13946		6.54886e-12	4.81834e-11
K.VQN[+1955.72397]MSQSIEVLDR.R	N3(NGlycan / 1955.724)	HexNAc(5)Hex(4)Fuc(2)	3	1.35908e-13	1.14718e-12	12.8668	743.031	393.138	393.138	3	1158.83	1158.83	-0.512069	3474.48	3474.48	Q62609	NOE1_RAT Noelin OS=Rattus norvegicus OX=10116 GN=Olfm1 PE=1 SV=1	101	62.7808	20007		5.95035e-15	4.78764e-14
K.VQN[+1647.61324]MSQSIEVLDRR.T	N3(NGlycan / 1647.6132)	HexNAc(5)Hex(3)Fuc(1)	1	2.22347e-05	0.000187653	4.65297	420.67	230.923	230.923	3	1108.16	1108.16	-0.0532502	3322.47	3322.47	Q62609	NOE1_RAT Noelin OS=Rattus norvegicus OX=10116 GN=Olfm1 PE=1 SV=1	101	58.9802	18284		7.3664e-07	5.69738e-06
K.VQN[+1647.61324]M[+15.99492]SQSIEVLDR.R	N3(NGlycan / 1647.6132); M4(Oxidation / 15.9949)	HexNAc(5)Hex(3)Fuc(1)	3	3.13429e-11	2.6456e-10	10.5039	670.301	343.351	343.351	3	1061.46	1061.46	-0.939776	3182.36	3182.37	Q62609	NOE1_RAT Noelin OS=Rattus norvegicus OX=10116 GN=Olfm1 PE=1 SV=1	101	49.0155	14305		1.05853e-12	8.00674e-12
K.VQN[+1647.61324]MSQSIEVLDR.R	N3(NGlycan / 1647.6132)	HexNAc(5)Hex(3)Fuc(1)	3	1.35908e-14	1.14718e-13	13.8668	796.378	551.73	551.73	3	1056.13	1056.13	-0.738513	3166.37	3166.37	Q62609	NOE1_RAT Noelin OS=Rattus norvegicus OX=10116 GN=Olfm1 PE=1 SV=1	101	63.9879	20541		8.03622e-16	6.26805e-15
K.EEVQN[+1955.72397]LTSVLNELQEEIGAYDYDELQSR.V	N5(NGlycan / 1955.724)	HexNAc(5)Hex(4)Fuc(2)	1	6.22694e-13	5.25605e-12	12.2057	651.007	629.947	629.947	4	1310.82	1310.82	-0.616772	5240.26	5240.27	Q62609	NOE1_RAT Noelin OS=Rattus norvegicus OX=10116 GN=Olfm1 PE=1 SV=1	183	119.2	52813		2.58167e-14	2.14095e-13
K.N[+1702.58133]LTIVDSGLK.F	N1(NGlycan / 1702.5813)	HexNAc(2)Hex(8)	1	1.6026e-09	1.35272e-08	8.79518	625.269	317.504	317.504	2	1381.6	1381.6	0.764886	2762.19	2762.19	Q63604	NTRK2_RAT BDNF/NT-3 growth factors receptor OS=Rattus norvegicus OX=10116 GN=Ntrk2 PE=1 SV=1	95	54.9622	16602		2.72858e-11	2.36455e-10
R.LAAPN[+1955.72397]LTVEEGK.S	N5(NGlycan / 1955.724)	HexNAc(5)Hex(4)Fuc(2)	2	4.43685e-07	3.74505e-06	6.35293	526.55	242.412	242.412	3	1066.47	1066.47	0.0330728	3197.4	3197.4	Q63604	NTRK2_RAT BDNF/NT-3 growth factors receptor OS=Rattus norvegicus OX=10116 GN=Ntrk2 PE=1 SV=1	201	53.8164	16158		9.96103e-09	8.48196e-08
R.LAAPN[+1647.61324]LTVEEGK.S	N5(NGlycan / 1647.6132)	HexNAc(5)Hex(3)Fuc(1)	3	1.30179e-13	1.09881e-12	12.8855	722.194	462.204	462.204	3	963.768	963.767	0.44302	2889.29	2889.29	Q63604	NTRK2_RAT BDNF/NT-3 growth factors receptor OS=Rattus norvegicus OX=10116 GN=Ntrk2 PE=1 SV=1	201	54.3162	16353		5.54251e-15	4.45747e-14
R.LAAPN[+1444.53387]LTVEEGK.S	N5(NGlycan / 1444.5339)	HexNAc(4)Hex(3)Fuc(1)	1	2.84019e-09	2.39735e-08	8.54665	560.583	393.98	393.98	2	1343.61	1343.61	0.627804	2686.21	2686.21	Q63604	NTRK2_RAT BDNF/NT-3 growth factors receptor OS=Rattus norvegicus OX=10116 GN=Ntrk2 PE=1 SV=1	201	54.5262	16436		4.31016e-11	3.44397e-10
K.HM[+15.99492]N[+1216.42286]ETSHTQGSLR.I	M2(Oxidation / 15.9949); N3(NGlycan / 1216.4229)	HexNAc(2)Hex(5)	3	1.04389e-06	8.81126e-06	5.98134	561.888	184.457	184.457	4	683.282	683.281	1.4907	2730.11	2730.1	Q63604	NTRK2_RAT BDNF/NT-3 growth factors receptor OS=Rattus norvegicus OX=10116 GN=Ntrk2 PE=1 SV=1	239	12.8548	3021		2.45709e-08	2.17957e-07
K.HMN[+1216.42286]ETSHTQGSLR.I	N3(NGlycan / 1216.4229)	HexNAc(2)Hex(5)	3	9.06666e-12	7.65301e-11	11.0426	679.999	534.651	433.482	3	905.375	905.375	0.91266	2714.11	2714.11	Q63604	NTRK2_RAT BDNF/NT-3 growth factors receptor OS=Rattus norvegicus OX=10116 GN=Ntrk2 PE=1 SV=1	239	16.1244	3911		2.87066e-13	2.20236e-12
R.ITN[+1955.72397]ISSDDSGK.Q	N3(NGlycan / 1955.724)	HexNAc(5)Hex(4)Fuc(2)	3	3.95043e-07	3.33448e-06	6.40336	569.364	314.74	314.74	3	1031.43	1031.43	2.1215	3092.27	3092.27	Q63604	NTRK2_RAT BDNF/NT-3 growth factors receptor OS=Rattus norvegicus OX=10116 GN=Ntrk2 PE=1 SV=1	252	21.7008	5430		8.64886e-09	7.32801e-08
R.ITN[+1647.61324]ISSDDSGK.Q	N3(NGlycan / 1647.6132)	HexNAc(5)Hex(3)Fuc(1)	2	4.95207e-07	4.17994e-06	6.30521	573.866	293.382	293.382	3	928.724	928.724	0.805034	2784.16	2784.16	Q63604	NTRK2_RAT BDNF/NT-3 growth factors receptor OS=Rattus norvegicus OX=10116 GN=Ntrk2 PE=1 SV=1	252	22.9813	5781		1.11064e-08	9.61337e-08
K.VYC[+57.02146]N[+1216.42286]MTEDK.V	N4(NGlycan / 1216.4229)	HexNAc(2)Hex(5)	1	5.90097e-11	4.9809e-10	10.2291	628.999	551.713	435.004	2	1188.45	1188.45	1.08934	2375.9	2375.9	Q9CPW0	CNTP2_MOUSE Contactin-associated protein-like 2 OS=Mus musculus OX=10090 GN=Cntnap2 PE=1 SV=2	627	26.1224	6654	C3(Carbamidomethyl / 57.0215)	1.66913e-12	1.29263e-11
R.EIC[+57.02146]SGN[+1216.42286]SSQC[+57.02146]APNVHK.M	N6(NGlycan / 1216.4229)	HexNAc(2)Hex(5)	1	1.21001e-18	1.02135e-17	17.9172	981.634	812.157	812.157	3	1002.07	1002.07	0.702609	3004.2	3004.2	Q9R1V6-17	ADA22_MOUSE Isoform 15 of Disintegrin and metalloproteinase domain-containing protein 22 OS=Mus musculus OX=10090 GN=Adam22	512	23.0417	5798	C3(Carbamidomethyl / 57.0215); C10(Carbamidomethyl / 57.0215)	1.06e-19	8.69444e-19
R.IQDFN[+1914.69743]YTDHTLGK.I	N5(NGlycan / 1914.6974)	HexNAc(4)Hex(5)Fuc(2)	1	5.68567e-06	4.799e-05	5.24522	481.805	158.287	158.287	3	1156.15	1156.15	-1.27425	3466.44	3466.44	O88871	GABR2_RAT Gamma-aminobutyric acid type B receptor subunit 2 OS=Rattus norvegicus OX=10116 GN=Gabbr2 PE=1 SV=2	384	52.7711	15738		1.87379e-07	1.4797e-06
R.IQDFN[+1647.61324]YTDHTLGK.I	N5(NGlycan / 1647.6132)	HexNAc(5)Hex(3)Fuc(1)	1	1.68256e-15	1.42022e-14	14.774	815.961	474.77	474.77	3	1067.12	1067.12	-0.620257	3199.36	3199.36	O88871	GABR2_RAT Gamma-aminobutyric acid type B receptor subunit 2 OS=Rattus norvegicus OX=10116 GN=Gabbr2 PE=1 SV=2	384	53.137	15886		1.42962e-16	1.16369e-15
R.IQDFN[+1606.58669]YTDHTLGK.I	N5(NGlycan / 1606.5867)	HexNAc(4)Hex(4)Fuc(1)	1	3.88027e-12	3.27527e-11	11.4111	735.31	349.085	349.085	3	1053.45	1053.45	-1.22777	3158.33	3158.33	O88871	GABR2_RAT Gamma-aminobutyric acid type B receptor subunit 2 OS=Rattus norvegicus OX=10116 GN=Gabbr2 PE=1 SV=2	384	53.0484	15855		1.77477e-13	1.43154e-12
R.IQDFN[+1444.53387]YTDHTLGK.I	N5(NGlycan / 1444.5339)	HexNAc(4)Hex(3)Fuc(1)	3	1.61162e-13	1.36034e-12	12.7927	720.881	444.84	444.84	3	999.43	999.431	-0.408873	2996.28	2996.28	O88871	GABR2_RAT Gamma-aminobutyric acid type B receptor subunit 2 OS=Rattus norvegicus OX=10116 GN=Gabbr2 PE=1 SV=2	384	53.4521	16018		7.49465e-15	6.00057e-14
R.IQDFN[+1216.42286]YTDHTLGK.I	N5(NGlycan / 1216.4229)	HexNAc(2)Hex(5)	1	1.68256e-14	1.42022e-13	13.774	769.61	474.247	474.247	3	923.393	923.394	-1.28616	2768.16	2768.17	O88871	GABR2_RAT Gamma-aminobutyric acid type B receptor subunit 2 OS=Rattus norvegicus OX=10116 GN=Gabbr2 PE=1 SV=2	384	53.8723	16180		1.1693e-15	9.35161e-15
K.DADEGDTLAN[+1955.72397]SSDLLK.E	N10(NGlycan / 1955.724)	HexNAc(5)Hex(4)Fuc(2)	1	9.77387e-12	8.24995e-11	11.0099	647.205	521.153	521.153	3	1207.17	1207.17	-0.339955	3619.49	3619.49	P04094	PENK_RAT Proenkephalin-A OS=Rattus norvegicus OX=10116 GN=Penk PE=1 SV=1	143	62.4063	19829		3.07655e-13	2.36593e-12
K.DADEGDTLAN[+1647.61324]SSDLLK.E	N10(NGlycan / 1647.6132)	HexNAc(5)Hex(3)Fuc(1)	1	1.79828e-09	1.5179e-08	8.74514	563.796	464.293	464.293	3	1104.46	1104.46	-1.20402	3311.37	3311.38	P04094	PENK_RAT Proenkephalin-A OS=Rattus norvegicus OX=10116 GN=Penk PE=1 SV=1	143	63.3437	20264		3.26085e-11	2.75924e-10
R.VETGEN[+1216.42286]C[+57.02146]TSPAPK.E	N6(NGlycan / 1216.4229)	HexNAc(2)Hex(5)	3	1.30179e-17	1.09881e-16	16.8855	934.965	827.808	827.808	3	869.357	869.356	0.566332	2606.06	2606.05	P29994	ITPR1_RAT Inositol 1,4,5-trisphosphate receptor type 1 OS=Rattus norvegicus OX=10116 GN=Itpr1 PE=1 SV=2	2499	19.8663	4928	C7(Carbamidomethyl / 57.0215)	1.14281e-18	8.89137e-18
R.SVLEN[+1702.58133]STSYEEAK.N	N5(NGlycan / 1702.5813)	HexNAc(2)Hex(8)	1	2.4231e-12	2.04529e-11	11.6156	663.74	572.652	572.652	3	1053.76	1053.76	1.13807	3159.27	3159.26	Q6P7S1	ASAH1_RAT Acid ceramidase OS=Rattus norvegicus OX=10116 GN=Asah1 PE=1 SV=1	254	39.3097	10658		1.13824e-13	9.34145e-13
R.SVLEN[+1540.52851]STSYEEAK.N	N5(NGlycan / 1540.5285)	HexNAc(2)Hex(7)	3	1.61162e-15	1.36034e-14	14.7927	803.199	718.71	718.71	2	1499.11	1499.11	-0.34644	2997.21	2997.21	Q6P7S1	ASAH1_RAT Acid ceramidase OS=Rattus norvegicus OX=10116 GN=Asah1 PE=1 SV=1	254	39.6991	10796		1.30757e-16	1.04568e-15
R.SVLEN[+1378.47569]STSYEEAK.N	N5(NGlycan / 1378.4757)	HexNAc(2)Hex(6)	1	1.61162e-14	1.36034e-13	13.7927	799.502	674.13	674.13	2	1418.08	1418.08	0.267977	2835.16	2835.16	Q6P7S1	ASAH1_RAT Acid ceramidase OS=Rattus norvegicus OX=10116 GN=Asah1 PE=1 SV=1	254	39.9456	10881		9.96357e-16	7.75665e-15
R.SVLEN[+1216.42286]STSYEEAK.N	N5(NGlycan / 1216.4229)	HexNAc(2)Hex(5)	3	1.61162e-12	1.36034e-11	11.7927	664.588	539.021	539.021	2	1337.06	1337.06	0.500229	2673.1	2673.1	Q6P7S1	ASAH1_RAT Acid ceramidase OS=Rattus norvegicus OX=10116 GN=Asah1 PE=1 SV=1	254	40.3845	11043		7.04446e-14	5.60862e-13
R.C[+57.02146]GHN[+1647.61324]ESELQVFWVDR.A	N4(NGlycan / 1647.6132)	HexNAc(5)Hex(3)Fuc(1)	1	1.68256e-12	1.42022e-11	11.774	690.327	644.596	644.596	3	1175.16	1175.16	-0.879736	3523.45	3523.46	Q5PPI4	LAMP5_RAT Lysosome-associated membrane glycoprotein 5 OS=Rattus norvegicus OX=10116 GN=Lamp5 PE=2 SV=1	99	79.0901	28136	C1(Carbamidomethyl / 57.0215)	8.75513e-14	7.2099e-13
R.C[+57.02146]GHN[+1606.58669]ESELQVFWVDR.A	N4(NGlycan / 1606.5867)	HexNAc(4)Hex(4)Fuc(1)	2	9.14065e-05	0.000771093	4.03902	492.614	238.482	238.482	3	1161.48	1161.48	2.0365	3482.44	3482.43	Q5PPI4	LAMP5_RAT Lysosome-associated membrane glycoprotein 5 OS=Rattus norvegicus OX=10116 GN=Lamp5 PE=2 SV=1	99	79.1563	28171	C1(Carbamidomethyl / 57.0215)	2.5759e-06	1.85612e-05
R.C[+57.02146]GHN[+1216.42286]ESELQVFWVDR.A	N4(NGlycan / 1216.4229)	HexNAc(2)Hex(5)	3	1.68256e-16	1.42022e-15	15.774	866.425	606.943	606.943	3	1031.43	1031.43	-1.00677	3092.26	3092.27	Q5PPI4	LAMP5_RAT Lysosome-associated membrane glycoprotein 5 OS=Rattus norvegicus OX=10116 GN=Lamp5 PE=2 SV=1	99	79.1485	28166	C1(Carbamidomethyl / 57.0215)	1.60581e-17	1.26886e-16
R.EDAQIN[+1647.61324]TTIGSVAAQDPDAAR.N	N6(NGlycan / 1647.6132)	HexNAc(5)Hex(3)Fuc(1)	1	1.15637e-16	9.76069e-16	15.9369	883.126	794.429	794.429	3	1264.22	1264.22	-1.37342	3790.63	3790.64	P55280	CADH6_RAT Cadherin-6 OS=Rattus norvegicus OX=10116 GN=Cdh6 PE=1 SV=1	394	62.5051	19878		9.05257e-18	6.8831e-17
R.EDAQIN[+1216.42286]TTIGSVAAQDPDAAR.N	N6(NGlycan / 1216.4229)	HexNAc(2)Hex(5)	1	1.10762e-16	9.34918e-16	15.9556	851.786	811.393	811.393	3	1120.49	1120.49	0.0814253	3359.45	3359.45	P55280	CADH6_RAT Cadherin-6 OS=Rattus norvegicus OX=10116 GN=Cdh6 PE=1 SV=1	394	62.1965	19729		8.69795e-18	6.53942e-17
R.DSYPDGN[+1647.61324]ITWYR.N	N7(NGlycan / 1647.6132)	HexNAc(5)Hex(3)Fuc(1)	2	2.3572e-07	1.98967e-06	6.6276	512.8	300.828	300.828	3	1045.43	1045.43	-1.58268	3134.27	3134.27	O35112	CD166_RAT CD166 antigen OS=Rattus norvegicus OX=10116 GN=Alcam PE=1 SV=1	161	70.7634	23736		4.74207e-09	3.9274e-08
R.DSYPDGN[+1216.42286]ITWYR.N	N7(NGlycan / 1216.4229)	HexNAc(2)Hex(5)	1	6.06764e-07	5.12156e-06	6.21698	505.682	288.931	288.931	2	1352.04	1352.04	-0.245562	2703.08	2703.08	O35112	CD166_RAT CD166 antigen OS=Rattus norvegicus OX=10116 GN=Alcam PE=1 SV=1	161	71.4122	24059		1.46465e-08	1.27466e-07
K.IIISPEEN[+1216.42286]VTLTC[+57.02146]TAENQLER.T	N8(NGlycan / 1216.4229)	HexNAc(2)Hex(5)	1	1.15637e-18	9.76069e-18	17.9369	960.154	887.906	887.906	3	1216.22	1216.22	-0.640569	3646.64	3646.64	O35112	CD166_RAT CD166 antigen OS=Rattus norvegicus OX=10116 GN=Alcam PE=1 SV=1	473	80.527	28849	C13(Carbamidomethyl / 57.0215)	1.00252e-19	8.41717e-19
R.EAN[+1864.63416]LTLDGYVHR.F	N3(NGlycan / 1864.6342)	HexNAc(2)Hex(9)	1	1.61162e-11	1.36034e-10	10.7927	646.397	521.154	521.154	3	1084.78	1084.78	-0.176228	3252.33	3252.33	P97846	CNTP1_RAT Contactin-associated protein 1 OS=Rattus norvegicus OX=10116 GN=Cntnap1 PE=1 SV=1	275	55.0675	16641		5.37109e-13	3.99186e-12
K.DGKPLLN[+2188.77753]DSR.M	N7(NGlycan / 2188.7775)	HexNAc(4)Hex(4)Fuc(1)NeuAc(2)	3	1.21522e-05	0.000102566	4.91535	426.946	161.987	161.987	3	1101.79	1101.79	0.329484	3303.36	3303.36	Q640R3	HECAM_MOUSE Hepatocyte cell adhesion molecule OS=Mus musculus OX=10090 GN=Hepacam PE=1 SV=2	183	31.0775	8115		4.05492e-07	3.05006e-06
K.DGKPLLN[+2147.75098]DSR.M	N7(NGlycan / 2147.751)	HexNAc(3)Hex(5)Fuc(1)NeuAc(2)	1	5.99342e-06	5.05874e-05	5.22233	470.724	188.028	188.028	3	1088.12	1088.12	-0.358971	3262.33	3262.34	Q640R3	HECAM_MOUSE Hepatocyte cell adhesion molecule OS=Mus musculus OX=10090 GN=Hepacam PE=1 SV=2	183	30.8998	8061		1.96453e-07	1.55208e-06
K.DGKPLLN[+2018.70838]DSR.M	N7(NGlycan / 2018.7084)	HexNAc(3)Hex(6)Fuc(1)NeuAc(1)	1	1.25771e-05	0.000106152	4.90042	443.932	181.149	181.149	3	1045.1	1045.1	1.41536	3133.3	3133.29	Q640R3	HECAM_MOUSE Hepatocyte cell adhesion molecule OS=Mus musculus OX=10090 GN=Hepacam PE=1 SV=2	183	26.8838	6875		4.3949e-07	3.31461e-06
K.DGKPLLN[+1897.68211]DSR.M	N7(NGlycan / 1897.6821)	HexNAc(4)Hex(4)Fuc(1)NeuAc(1)	1	8.94858e-06	7.5529e-05	5.04825	460.451	178.498	178.498	3	1004.76	1004.76	0.549887	3012.27	3012.27	Q640R3	HECAM_MOUSE Hepatocyte cell adhesion molecule OS=Mus musculus OX=10090 GN=Hepacam PE=1 SV=2	183	27.4628	7052		3.19368e-07	2.46859e-06
K.DGKPLLN[+1856.65556]DSR.M	N7(NGlycan / 1856.6556)	HexNAc(3)Hex(5)Fuc(1)NeuAc(1)	1	1.27239e-05	0.000107392	4.89538	444.429	158.699	158.699	3	991.085	991.085	-0.0180952	2971.24	2971.24	Q640R3	HECAM_MOUSE Hepatocyte cell adhesion molecule OS=Mus musculus OX=10090 GN=Hepacam PE=1 SV=2	183	27.3505	7015		4.54885e-07	3.42995e-06
K.DGKPLLN[+1752.64460]DSR.M	N7(NGlycan / 1752.6446)	HexNAc(4)Hex(4)Fuc(2)	1	1.92925e-05	0.000162825	4.71461	468.906	192.776	192.776	3	956.417	956.415	1.86616	2867.24	2867.23	Q640R3	HECAM_MOUSE Hepatocyte cell adhesion molecule OS=Mus musculus OX=10090 GN=Hepacam PE=1 SV=2	183	23.1155	5818		6.31096e-07	4.81836e-06
R.YYHGELSYLN[+1540.52851]VTR.K	N10(NGlycan / 1540.5285)	HexNAc(2)Hex(7)	1	1.61162e-11	1.36034e-10	10.7927	635.668	394.276	394.276	3	1052.45	1052.44	0.482587	3155.32	3155.32	P24268	CATD_RAT Cathepsin D OS=Rattus norvegicus OX=10116 GN=Ctsd PE=1 SV=1	249	65.1512	21083		5.50644e-13	4.12571e-12
R.YYHGELSYLN[+1378.47569]VTR.K	N10(NGlycan / 1378.4757)	HexNAc(2)Hex(6)	3	1.61162e-14	1.36034e-13	13.7927	766.388	528.33	528.33	3	998.427	998.427	-0.134408	2993.27	2993.27	P24268	CATD_RAT Cathepsin D OS=Rattus norvegicus OX=10116 GN=Ctsd PE=1 SV=1	249	65.2913	21154		1.03212e-15	8.10499e-15
R.YYHGELSYLN[+1216.42286]VTR.K	N10(NGlycan / 1216.4229)	HexNAc(2)Hex(5)	3	1.61162e-14	1.36034e-13	13.7927	793.804	516.774	516.774	3	944.409	944.409	-0.433991	2831.21	2831.21	P24268	CATD_RAT Cathepsin D OS=Rattus norvegicus OX=10116 GN=Ctsd PE=1 SV=1	249	65.6438	21308		1.04104e-15	8.19178e-15
K.INN[+1647.61324]STNEGM[+15.99492]NVK.K	N3(NGlycan / 1647.6132); M9(Oxidation / 15.9949)	HexNAc(5)Hex(3)Fuc(1)	1	8.45341e-07	7.13533e-06	6.07297	555.695	184.476	7.58089	3	995.414	995.415	-0.865981	2984.23	2984.23	Q00959	NMDE1_RAT Glutamate receptor ionotropic, NMDA 2A OS=Rattus norvegicus OX=10116 GN=Grin2a PE=1 SV=2	442	17.7862	4369		2.07148e-08	1.7993e-07
K.INN[+1647.61324]STNEGMNVK.K	N3(NGlycan / 1647.6132)	HexNAc(5)Hex(3)Fuc(1)	1	6.85489e-11	5.78609e-10	10.164	669.578	333.157	5.63821	3	990.084	990.083	0.706258	2968.24	2968.23	Q00959	NMDE1_RAT Glutamate receptor ionotropic, NMDA 2A OS=Rattus norvegicus OX=10116 GN=Grin2a PE=1 SV=2	442	26.2095	6678		1.95455e-12	1.52487e-11
R.N[+1378.47569]C[+57.02146]SIFLADINQER.H	N1(NGlycan / 1378.4757)	HexNAc(2)Hex(6)	3	1.35908e-12	1.14718e-11	11.8668	699.143	534.964	534.964	3	986.747	986.748	-1.18986	2958.23	2958.23	P45479	PPT1_RAT Palmitoyl-protein thioesterase 1 OS=Rattus norvegicus OX=10116 GN=Ppt1 PE=1 SV=1	197	73.9992	25494	C2(Carbamidomethyl / 57.0215)	5.03948e-14	4.01872e-13
R.N[+1216.42286]C[+57.02146]SIFLADINQER.H	N1(NGlycan / 1216.4229)	HexNAc(2)Hex(5)	3	2.5953e-18	2.19064e-17	17.5858	964.848	783.827	783.827	3	932.729	932.73	-1.75082	2796.17	2796.18	P45479	PPT1_RAT Palmitoyl-protein thioesterase 1 OS=Rattus norvegicus OX=10116 GN=Ppt1 PE=1 SV=1	197	74.3634	25671	C2(Carbamidomethyl / 57.0215)	2.64423e-19	2.22826e-18
R.N[+1054.37004]C[+57.02146]SIFLADINQER.H	N1(NGlycan / 1054.37)	HexNAc(2)Hex(4)	1	2.35752e-06	1.98991e-05	5.62754	428.491	273.903	273.903	2	1317.56	1317.57	-2.19038	2634.12	2634.12	P45479	PPT1_RAT Palmitoyl-protein thioesterase 1 OS=Rattus norvegicus OX=10116 GN=Ppt1 PE=1 SV=1	197	81.2657	29246	C2(Carbamidomethyl / 57.0215)	6.57733e-08	5.5973e-07
R.VVRPDSELGERPPEDN[+1216.42286]QSFQYDHEAFLGKEDSK.T	N16(NGlycan / 1216.4229)	HexNAc(2)Hex(5)	3	9.78293e-15	8.2576e-14	14.0095	832.77	618.78	618.78	5	1007.85	1007.85	0.28125	5035.21	5035.21	Q05186	RCN1_MOUSE Reticulocalbin-1 OS=Mus musculus OX=10090 GN=Rcn1 PE=1 SV=1	32	63.0452	20129		4.54205e-16	3.58549e-15
R.VVRPDSELGERPPEDN[+1216.42286]QSFQYDHEAFLGK.E	N16(NGlycan / 1216.4229)	HexNAc(2)Hex(5)	1	1.95123e-19	1.647e-18	18.7097	1011.92	602.823	602.823	5	916.007	916.009	-2.05961	4576.01	4576.02	Q05186	RCN1_MOUSE Reticulocalbin-1 OS=Mus musculus OX=10090 GN=Rcn1 PE=1 SV=1	32	67.2987	22044		1.79117e-20	1.46782e-19
R.AMN[+1501.55533]SSSFEGVSGHVVFDASGSR.M	N3(NGlycan / 1501.5553)	HexNAc(5)Hex(3)	1	1.37123e-12	1.15743e-11	11.8629	658.545	567.275	567.275	3	1243.86	1243.86	0.593819	3729.56	3729.56	Q9WV18	GABR1_MOUSE Gamma-aminobutyric acid type B receptor subunit 1 OS=Mus musculus OX=10090 GN=Gabbr1 PE=1 SV=1	511	70.8281	23769		5.41677e-14	4.14265e-13
R.EQSN[+1647.61324]ATQLDGPAR.E	N4(NGlycan / 1647.6132)	HexNAc(5)Hex(3)Fuc(1)	4	1.30179e-15	1.09881e-14	14.8855	806.205	468.278	468.278	3	1012.1	1012.1	0.32907	3034.28	3034.27	P01186	NEU2_RAT Vasopressin-neurophysin 2-copeptin OS=Rattus norvegicus OX=10116 GN=Avp PE=1 SV=1	132	26.3558	6719		9.57307e-17	7.83505e-16
K.LTC[+57.02146]EC[+57.02146]EHN[+1378.47569]TTGPDC[+57.02146]GK.C	N8(NGlycan / 1378.4757)	HexNAc(2)Hex(6)	1	2.25227e-14	1.9011e-13	13.6474	785.003	785.003	785.003	3	1086.41	1086.41	0.768689	3257.22	3257.22	Q8R4G0-4	NTNG1_MOUSE Isoform 1D of Netrin-G1 OS=Mus musculus OX=10090 GN=Ntng1	313	18.9843	4686	C3(Carbamidomethyl / 57.0215); C5(Carbamidomethyl / 57.0215); C14(Carbamidomethyl / 57.0215)	1.5766e-15	1.27874e-14
K.LTC[+57.02146]EC[+57.02146]EHN[+1216.42286]TTGPDC[+57.02146]GK.C	N8(NGlycan / 1216.4229)	HexNAc(2)Hex(5)	1	2.25227e-15	1.9011e-14	14.6474	845.481	845.481	845.481	3	1032.39	1032.39	1.07436	3095.17	3095.16	Q8R4G0-4	NTNG1_MOUSE Isoform 1D of Netrin-G1 OS=Mus musculus OX=10090 GN=Ntng1	313	19.3753	4791	C3(Carbamidomethyl / 57.0215); C5(Carbamidomethyl / 57.0215); C14(Carbamidomethyl / 57.0215)	1.92424e-16	1.61854e-15
R.LAYSGIPLN[+1216.42286]LTLDNR.V	N9(NGlycan / 1216.4229)	HexNAc(2)Hex(5)	3	1.35908e-14	1.14718e-13	13.8668	760.132	484.42	484.42	3	959.447	959.448	-1.44349	2876.33	2876.33	P63079	GBRB3_RAT Gamma-aminobutyric acid receptor subunit beta-3 OS=Rattus norvegicus OX=10116 GN=Gabrb3 PE=1 SV=1	97	90.5613	34182		8.11302e-16	6.34274e-15
K.MN[+1216.42286]GTDMNLEPGSR.H	N2(NGlycan / 1216.4229)	HexNAc(2)Hex(5)	1	1.41483e-08	1.19423e-07	7.8493	534.196	430.447	226.503	2	1319.52	1319.52	1.06227	2638.04	2638.04	P22063	CNTN2_RAT Contactin-2 OS=Rattus norvegicus OX=10116 GN=Cntn2 PE=1 SV=1	77	45.8366	13136		3.22295e-10	2.84241e-09
K.GTEILGN[+1216.42286]STR.V	N7(NGlycan / 1216.4229)	HexNAc(2)Hex(5)	1	1.03994e-08	8.77793e-08	7.98299	570.53	394.677	394.677	2	1132.49	1132.49	0.838534	2263.97	2263.97	P22063	CNTN2_RAT Contactin-2 OS=Rattus norvegicus OX=10116 GN=Cntn2 PE=1 SV=1	457	29.7811	7730		2.20647e-10	2.01658e-09
R.ALPGGTDN[+3007.05796]ASAASAAGAPGPQR.S	N8(NGlycan / 3007.058)	HexNAc(5)Hex(6)Fuc(1)NeuAc(3)	3	2.68642e-11	2.26756e-10	10.5708	613.851	477.998	477.998	4	1237.01	1236.76	3.86129	4945.03	4944.01	O35764	NPTXR_RAT Neuronal pentraxin receptor OS=Rattus norvegicus OX=10116 GN=Nptxr PE=1 SV=1	35	44.6446	12663		9.39034e-13	7.27857e-12
R.WIN[+1647.61324]DTDVVYK.T	N3(NGlycan / 1647.6132)	HexNAc(5)Hex(3)Fuc(1)	3	2.56076e-11	2.16149e-10	10.5916	620.678	409.309	409.309	3	967.416	967.416	-0.100432	2900.23	2900.23	Q6Q629	DPP10_RAT Inactive dipeptidyl peptidase 10 OS=Rattus norvegicus OX=10116 GN=Dpp10 PE=1 SV=1	88	59.2354	18392		8.62266e-13	6.9568e-12
R.WIN[+1444.53387]DTDVVYK.T	N3(NGlycan / 1444.5339)	HexNAc(4)Hex(3)Fuc(1)	1	9.80048e-06	8.27189e-05	5.00875	463.094	305.572	305.572	2	1349.08	1349.08	-0.183612	2697.15	2697.15	Q6Q629	DPP10_RAT Inactive dipeptidyl peptidase 10 OS=Rattus norvegicus OX=10116 GN=Dpp10 PE=1 SV=1	88	59.5618	18545		3.42385e-07	2.64163e-06
K.AGVN[+1864.63416]YTLQVYPDEGYHISDK.S	N4(NGlycan / 1864.6342)	HexNAc(2)Hex(9)	1	1.91708e-07	1.61817e-06	6.71736	489.055	370.372	370.372	3	1378.58	1378.58	0.425034	4133.71	4133.71	Q6Q629	DPP10_RAT Inactive dipeptidyl peptidase 10 OS=Rattus norvegicus OX=10116 GN=Dpp10 PE=1 SV=1	745	72.1649	24493		4.15289e-09	3.34412e-08
R.TDDEVVQREEEAIQLDGLN[+1378.47569]ASQIR.E	N19(NGlycan / 1378.4757)	HexNAc(2)Hex(6)	1	3.17013e-10	2.67585e-09	9.49892	593.129	430.114	430.114	3	1369.61	1369.61	-0.252495	4106.81	4106.81	Q66HD0	ENPL_RAT Endoplasmin OS=Rattus norvegicus OX=10116 GN=Hsp90b1 PE=1 SV=2	44	86.5807	32062		6.6743e-12	4.94293e-11
K.HNN[+1216.42286]DTQHIWESDSNEFSVIADPR.G	N3(NGlycan / 1216.4229)	HexNAc(2)Hex(5)	1	2.12655e-11	1.79498e-10	10.6723	605.554	455.168	455.168	4	982.663	982.663	-0.612586	3927.63	3927.63	Q66HD0	ENPL_RAT Endoplasmin OS=Rattus norvegicus OX=10116 GN=Hsp90b1 PE=1 SV=2	215	75.7669	26400		7.10272e-13	5.45733e-12
R.N[+1702.58133]QSVGDPTVDLIR.T	N1(NGlycan / 1702.5813)	HexNAc(2)Hex(8)	3	4.75108e-08	4.0103e-07	7.32321	533.735	433.017	433.017	3	1039.44	1039.44	1.16469	3116.32	3116.31	P27615	SCRB2_RAT Lysosome membrane protein 2 OS=Rattus norvegicus OX=10116 GN=Scarb2 PE=1 SV=2	122	58.6692	18154		8.53265e-10	7.35984e-09
R.N[+1216.42286]QSVGDPTVDLIR.T	N1(NGlycan / 1216.4229)	HexNAc(2)Hex(5)	1	1.68256e-10	1.42022e-09	9.77403	598.452	414.138	414.138	2	1315.58	1315.58	-0.810709	2630.15	2630.16	P27615	SCRB2_RAT Lysosome membrane protein 2 OS=Rattus norvegicus OX=10116 GN=Scarb2 PE=1 SV=2	122	59.9333	18714		3.60166e-12	2.82265e-11
K.N[+2204.77244]STLC[+57.02146]DLC[+57.02146]IGPAK.C	N1(NGlycan / 2204.7724)	HexNAc(4)Hex(5)NeuAc(2)	1	1.04254e-06	8.79983e-06	5.98191	426.241	297.175	297.175	3	1218.49	1218.49	-0.502137	3653.46	3653.46	P12346	TRFE_RAT Serotransferrin OS=Rattus norvegicus OX=10116 GN=Tf PE=1 SV=3	512	69.979	23350	C5(Carbamidomethyl / 57.0215); C8(Carbamidomethyl / 57.0215)	2.42206e-08	2.14504e-07
R.DN[+1647.61324]HTHSDIQVK.L	N2(NGlycan / 1647.6132)	HexNAc(5)Hex(3)Fuc(1)	1	4.46597e-05	0.000376856	4.35008	414.258	204.23	204.23	3	981.083	981.082	1.06152	2941.23	2941.23	Q5FVH2	PLD3_RAT Phospholipase D3 OS=Rattus norvegicus OX=10116 GN=Pld3 PE=1 SV=1	384	16.9451	4137		1.35813e-06	1.07388e-05
R.DN[+876.32230]HTHSDIQVK.L	N2(NGlycan / 876.3223)	HexNAc(2)Hex(2)Fuc(1)	1	1.78351e-14	1.50543e-13	13.7487	849.346	615.144	615.144	3	723.986	723.985	1.0108	2169.94	2169.94	Q5FVH2	PLD3_RAT Phospholipase D3 OS=Rattus norvegicus OX=10116 GN=Pld3 PE=1 SV=1	384	16.6435	4054		1.24317e-15	1.00692e-14
R.VHVN[+1540.52851]SSSDNLDYPVLVVVR.Q	N4(NGlycan / 1540.5285)	HexNAc(2)Hex(7)	1	3.34376e-05	0.00028218	4.47577	403.631	286.978	286.978	3	1218.21	1218.22	-6.55244	3652.61	3652.64	Q6AXF6	SIDT1_MOUSE SID1 transmembrane family member 1 OS=Mus musculus OX=10090 GN=Sidt1 PE=1 SV=1	80	79.0713	28127		1.04198e-06	8.32278e-06
R.VHVN[+1216.42286]SSSDNLDYPVLVVVR.Q	N4(NGlycan / 1216.4229)	HexNAc(2)Hex(5)	1	7.16338e-13	6.04648e-12	12.1449	737.74	528.212	528.212	3	1110.18	1110.18	-3.31185	3328.52	3328.53	Q6AXF6	SIDT1_MOUSE SID1 transmembrane family member 1 OS=Mus musculus OX=10090 GN=Sidt1 PE=1 SV=1	80	79.7221	28457		2.87096e-14	2.42262e-13
R.N[+1216.42286]C[+57.02146]TLLLSTLSPELGGK.Y	N1(NGlycan / 1216.4229)	HexNAc(2)Hex(5)	1	9.77387e-16	8.24995e-15	15.0099	843	594.979	594.979	3	973.78	973.781	-0.237094	2919.33	2919.33	P20917	MAG_MOUSE Myelin-associated glycoprotein OS=Mus musculus OX=10090 GN=Mag PE=1 SV=3	99	91.0917	34457	C2(Carbamidomethyl / 57.0215)	5.84169e-17	4.79259e-16
R.DAGYTN[+2204.77244]ATTTDQHGLAK.F	N6(NGlycan / 2204.7724)	HexNAc(4)Hex(5)NeuAc(2)	1	2.88483e-07	2.43503e-06	6.53988	530.999	300.762	300.762	3	1323.54	1323.54	0.71722	3968.59	3968.59	P14046	A1I3_RAT Alpha-1-inhibitor 3 OS=Rattus norvegicus OX=10116 GN=A1i3 PE=1 SV=1	388	36.7971	9823		5.84187e-09	5.01473e-08
K.YLN[+2204.77244]ETQQLTEK.I	N3(NGlycan / 2204.7724)	HexNAc(4)Hex(5)NeuAc(2)	1	6.95456e-10	5.87022e-09	9.15773	618.498	303.113	303.113	3	1191.16	1191.16	0.403204	3571.46	3571.46	P14046	A1I3_RAT Alpha-1-inhibitor 3 OS=Rattus norvegicus OX=10116 GN=A1i3 PE=1 SV=1	992	50.9741	15039		1.18259e-11	9.75902e-11
R.GTN[+1444.53387]ESDASSTQFTTEIDAPK.N	N3(NGlycan / 1444.5339)	HexNAc(4)Hex(3)Fuc(1)	1	1.15637e-14	9.76069e-14	13.9369	750.384	626.727	626.727	3	1181.83	1181.83	-1.2987	3543.47	3543.47	Q05546	TENR_RAT Tenascin-R OS=Rattus norvegicus OX=10116 GN=Tnr PE=1 SV=1	578	57.4853	17636		6.47338e-16	4.80933e-15
R.WQLN[+1216.42286]GSDIDTSLDHR.Y	N4(NGlycan / 1216.4229)	HexNAc(2)Hex(5)	3	1.61162e-14	1.36034e-13	13.7927	761.065	535.39	535.39	3	991.754	991.754	0.142169	2973.25	2973.25	Q62682	CNTN3_RAT Contactin-3 OS=Rattus norvegicus OX=10116 GN=Cntn3 PE=1 SV=1	62	70.4074	23555		1.04994e-15	8.27845e-15
K.NSAEN[+1216.42286]QTHQTFLTVEK.Y	N5(NGlycan / 1216.4229)	HexNAc(2)Hex(5)	1	2.25227e-14	1.9011e-13	13.6474	792.437	620.568	620.568	3	1021.78	1021.78	0.803737	3063.32	3063.32	Q91XT9	ASAH2_RAT Neutral ceramidase OS=Rattus norvegicus OX=10116 GN=Asah2 PE=1 SV=1	664	46.5857	13408		1.5886e-15	1.2904e-14
R.N[+1216.42286]LSVVILGASDKDLHPNTDPFK.F	N1(NGlycan / 1216.4229)	HexNAc(2)Hex(5)	3	6.73413e-14	5.68416e-13	13.1717	785.132	639.585	639.585	3	1199.56	1199.56	-1.33194	3596.67	3596.67	Q9WTR5	CAD13_MOUSE Cadherin-13 OS=Mus musculus OX=10090 GN=Cdh13 PE=1 SV=2	598	83.0579	30170		2.97821e-15	2.41705e-14
R.QELN[+1955.72397]DSLQVAER.L	N4(NGlycan / 1955.724)	HexNAc(5)Hex(4)Fuc(2)	1	4.32995e-06	3.65473e-05	5.36352	444.205	179.551	179.551	3	1119.81	1119.81	-0.863931	3357.42	3357.42	P05371	CLUS_RAT Clusterin OS=Rattus norvegicus OX=10116 GN=Clu PE=1 SV=2	324	48.0584	13945		1.37932e-07	1.06039e-06
R.QELN[+1647.61324]DSLQVAER.L	N4(NGlycan / 1647.6132)	HexNAc(5)Hex(3)Fuc(1)	3	9.82179e-09	8.2904e-08	8.00781	586.612	258.956	258.956	3	1017.11	1017.11	-0.68623	3049.31	3049.31	P05371	CLUS_RAT Clusterin OS=Rattus norvegicus OX=10116 GN=Clu PE=1 SV=2	324	49.0188	14307		2.01505e-10	1.82803e-09
R.HLYTTTGGETDFTN[+1864.63416]VTSLR.G	N14(NGlycan / 1864.6342)	HexNAc(2)Hex(9)	1	1.37123e-13	1.15743e-12	12.8629	718.194	592.761	592.761	3	1326.56	1326.56	-0.201533	3977.65	3977.65	Q6PHU5	SORT_MOUSE Sortilin OS=Mus musculus OX=10090 GN=Sort1 PE=1 SV=1	391	66.5794	21731		6.22897e-15	4.92373e-14
R.EDNPDKNPEAPLN[+1216.42286]VSR.V	N13(NGlycan / 1216.4229)	HexNAc(2)Hex(5)	1	1.88321e-13	1.58958e-12	12.7251	707.544	488.261	488.261	3	1004.43	1004.43	0.293612	3011.29	3011.28	Q9QUR8	SEM7A_MOUSE Semaphorin-7A OS=Mus musculus OX=10090 GN=Sema7a PE=1 SV=1	244	39.5191	10737		1.11987e-14	8.93729e-14
R.ELSQWHN[+1647.61324]LTVIAAEINNPK.E	N7(NGlycan / 1647.6132)	HexNAc(5)Hex(3)Fuc(1)	1	1.37123e-12	1.15743e-11	11.8629	678.645	442.216	442.216	3	1275.59	1275.59	-0.0859351	3824.75	3824.75	P70408	CAD10_MOUSE Cadherin-10 OS=Mus musculus OX=10090 GN=Cdh10 PE=1 SV=3	450	89.4885	33600		5.60564e-14	4.32804e-13
K.VEFHWGHSN[+1647.61324]GSAGSEHSVNGR.R	N9(NGlycan / 1647.6132)	HexNAc(5)Hex(3)Fuc(1)	1	1.37123e-12	1.15743e-11	11.8629	650.918	573.815	573.815	5	780.529	780.529	-0.135104	3898.62	3898.62	Q05909	PTPRG_MOUSE Receptor-type tyrosine-protein phosphatase gamma OS=Mus musculus OX=10090 GN=Ptprg PE=1 SV=1	148	40.3503	11031		5.35369e-14	4.08072e-13
R.LLFFDNYEHN[+1378.47569]TSVVK.K	N10(NGlycan / 1378.4757)	HexNAc(2)Hex(6)	1	1.61162e-12	1.36034e-11	11.7927	661.569	405.288	405.288	3	1068.8	1068.8	0.204372	3204.39	3204.39	P97952	SCN1B_MOUSE Sodium channel subunit beta-1 OS=Mus musculus OX=10090 GN=Scn1b PE=1 SV=1	126	78.7494	27958		7.48085e-14	6.03602e-13
K.WPADKEN[+1216.42286]DTGIVGQHSSC[+57.02146]DVQGGGISSYANDPSK.A	N7(NGlycan / 1216.4229)	HexNAc(2)Hex(5)	1	7.03198e-12	5.93557e-11	11.1529	623.544	422.83	422.83	4	1199.01	1199.01	-0.317897	4793.01	4793.02	O35795	ENTP2_RAT Ectonucleoside triphosphate diphosphohydrolase 2 OS=Rattus norvegicus OX=10116 GN=Entpd2 PE=1 SV=1	58	59.4617	18493	C18(Carbamidomethyl / 57.0215)	2.56277e-13	2.03638e-12
K.DLN[+1647.61324]ASDNNTEFLK.N	N3(NGlycan / 1647.6132)	HexNAc(5)Hex(3)Fuc(1)	2	5.08968e-06	4.29596e-05	5.29331	417.052	185.216	10.3922	2	1564.65	1564.66	-1.42945	3128.3	3128.3	Q6PHS9	CA2D2_MOUSE Voltage-dependent calcium channel subunit alpha-2/delta-2 OS=Mus musculus OX=10090 GN=Cacna2d2 PE=1 SV=1	697	56.5284	17222		1.633e-07	1.24035e-06
R.DLN[+1216.42286]ISEDR.M	N3(NGlycan / 1216.4229)	HexNAc(2)Hex(5)	1	1.49521e-08	1.26208e-07	7.8253	535.504	408.026	408.026	2	1089.44	1089.44	0.165717	2177.88	2177.88	Q45R42	LRRC4_RAT Leucine-rich repeat-containing protein 4 OS=Rattus norvegicus OX=10116 GN=Lrrc4 PE=1 SV=1	360	38.378	10344		3.54804e-10	3.10952e-09
K.YTGN[+2204.77244]ASALFILPDQGK.M	N4(NGlycan / 2204.7724)	HexNAc(4)Hex(5)NeuAc(2)	1	3.9723e-08	3.35295e-07	7.40096	570.424	350.548	350.548	3	1300.55	1300.55	0.160768	3899.65	3899.65	P09006	SPA3N_RAT Serine protease inhibitor A3N OS=Rattus norvegicus OX=10116 GN=Serpina3n PE=1 SV=3	266	93.1488	35569		7.39328e-10	6.40536e-09
K.VTYN[+1216.42286]GSSC[+57.02146]GDDK.N	N4(NGlycan / 1216.4229)	HexNAc(2)Hex(5)	1	7.80344e-07	6.58671e-06	6.10771	479.692	304.006	304.006	2	1259.98	1259.98	1.38787	2518.95	2518.95	P17046	LAMP2_RAT Lysosome-associated membrane glycoprotein 2 OS=Rattus norvegicus OX=10116 GN=Lamp2 PE=1 SV=3	68	19.2716	4763	C8(Carbamidomethyl / 57.0215)	1.82516e-08	1.58272e-07
R.NGGN[+1647.61324]ATLQVDNWPVNEHYPTGNTDNER.L	N4(NGlycan / 1647.6132)	HexNAc(5)Hex(3)Fuc(1)	1	1.77224e-07	1.49591e-06	6.75148	505.16	306.932	306.932	3	1553.99	1553.99	-0.923829	4659.96	4659.96	Q6P9K9	NRX3A_MOUSE Neurexin-3 OS=Mus musculus OX=10090 GN=Nrxn3 PE=1 SV=2	1186	68.1672	22457		3.8884e-09	3.08207e-08
R.FN[+2204.77244]DTNVVHTVK.T	N2(NGlycan / 2204.7724)	HexNAc(4)Hex(5)NeuAc(2)	1	1.62541e-06	1.37197e-05	5.78904	492.272	266.637	266.637	3	1160.15	1160.15	0.0624569	3478.43	3478.43	P24090	FETUA_RAT Alpha-2-HS-glycoprotein OS=Rattus norvegicus OX=10116 GN=Ahsg PE=1 SV=2	155	47.2482	13666		4.39845e-08	3.83924e-07
R.ETN[+1216.42286]ETSFEAGIR.V	N3(NGlycan / 1216.4229)	HexNAc(2)Hex(5)	1	1.82805e-06	1.54301e-05	5.73801	457.393	271.178	271.178	2	1285.53	1285.53	1.1284	2570.05	2570.05	Q9JHS6	ASIC4_RAT Acid-sensing ion channel 4 OS=Rattus norvegicus OX=10116 GN=Asic4 PE=2 SV=1	241	47.9698	13917		4.85469e-08	4.23631e-07
R.VPAELN[+1216.42286]GSMYR.C	N6(NGlycan / 1216.4229)	HexNAc(2)Hex(5)	1	2.62769e-06	2.21795e-05	5.58043	488.45	333.261	333.261	2	1227.02	1227.02	2.096	2453.03	2453.03	Q7TNR6	IGS21_MOUSE Immunoglobulin superfamily member 21 OS=Mus musculus OX=10090 GN=Igsf21 PE=1 SV=1	402	51.1025	15088		7.69442e-08	6.54767e-07
K.DLDLSC[+57.02146]N[+1216.42286]ITTDR.V	N7(NGlycan / 1216.4229)	HexNAc(2)Hex(5)	1	3.32135e-06	2.80343e-05	5.47869	404.312	242.025	242.025	2	1320.04	1320.04	1.03228	2639.08	2639.08	Q9WV91	FPRP_MOUSE Prostaglandin F2 receptor negative regulator OS=Mus musculus OX=10090 GN=Ptgfrn PE=1 SV=2	294	59.5994	18564	C6(Carbamidomethyl / 57.0215)	1.01124e-07	8.49034e-07
R.HNEQN[+1955.72397]LSLADVTQQAGLVK.S	N5(NGlycan / 1955.724)	HexNAc(5)Hex(4)Fuc(2)	1	6.28498e-06	5.30482e-05	5.2017	473.526	268.447	268.447	3	1340.6	1340.94	-0.846837	4019.78	4020.79	Q63259	PTPRN_RAT Receptor-type tyrosine-protein phosphatase-like N OS=Rattus norvegicus OX=10116 GN=Ptprn PE=1 SV=2	524	71.0929	23899		2.07912e-07	1.64703e-06
R.N[+1216.42286]VTDTFK.R	N1(NGlycan / 1216.4229)	HexNAc(2)Hex(5)	1	1.24579e-05	0.000105146	4.90456	421.925	318.141	318.141	2	1020.92	1020.92	0.74991	2040.84	2040.84	Q80ZF8	AGRB3_MOUSE Adhesion G protein-coupled receptor B3 OS=Mus musculus OX=10090 GN=Adgrb3 PE=1 SV=2	625	30.8886	8058		4.28054e-07	3.20034e-06
R.STNHEPSEMSN[+1647.61324]R.T	N11(NGlycan / 1647.6132)	HexNAc(5)Hex(3)Fuc(1)	1	1.78712e-05	0.000150831	4.74785	482.869	111.586	111.586	3	1012.74	1012.74	0.161409	3036.2	3036.2	Q8BGU2	CBLN2_MOUSE Cerebellin-2 OS=Mus musculus OX=10090 GN=Cbln2 PE=1 SV=1	100	18.3097	4514		5.86342e-07	4.42528e-06
